# Supplementary material
Source: publisher figshare collection journal article supplement (https://diabetesjournals.figshare.com/articles/dataset/_/14394707)
Supplement: Supplementary file 1 [file 1]

## Sheet: Info
Islet TC coordinates (hg19) at two samples thresholds - 10-sample (selected in the manuscript) and a more lenient 5-sample (for reference)
chrom	chromosome
start	start coordinate
end	end coordinate
name	blank
score	blank
strand	strand

## Sheet: tcs_10sample
chrom	start	end	name	score	strand
chr10	100027461	100027953	.	.	-
chr10	100206349	100206712	.	.	-
chr10	101190379	101190436	.	.	-
chr10	101419100	101419545	.	.	+
chr10	101491756	101491937	.	.	-
chr10	101491961	101492066	.	.	+
chr10	10175259	10175393	.	.	+
chr10	101769638	101769698	.	.	-
chr10	101945347	101945808	.	.	-
chr10	102027378	102027454	.	.	-
chr10	102046113	102046472	.	.	-
chr10	102106834	102107348	.	.	+
chr10	102133249	102133622	.	.	+
chr10	102254561	102254915	.	.	-
chr10	102289586	102289680	.	.	-
chr10	102295683	102295709	.	.	+
chr10	102672719	102672753	.	.	+
chr10	102746980	102747285	.	.	-
chr10	102791843	102792214	.	.	+
chr10	102828423	102828426	.	.	+
chr10	103113759	103114198	.	.	+
chr10	103124779	103124792	.	.	-
chr10	103347822	103348043	.	.	-
chr10	103348036	103348089	.	.	+
chr10	1034361	1034418	.	.	+
chr10	103543151	103543172	.	.	-
chr10	103578159	103578206	.	.	-
chr10	103815741	103815928	.	.	-
chr10	103911931	103912482	.	.	+
chr10	104005258	104005471	.	.	+
chr10	104012475	104012476	.	.	+
chr10	104048320	104048322	.	.	+
chr10	104094459	104094576	.	.	+
chr10	104095911	104095912	.	.	+
chr10	104153993	104154423	.	.	+
chr10	104155015	104155366	.	.	-
chr10	104192181	104192409	.	.	-
chr10	104262092	104262494	.	.	-
chr10	104405674	104406149	.	.	-
chr10	104473960	104474200	.	.	-
chr10	104503702	104504194	.	.	+
chr10	104613979	104614046	.	.	+
chr10	104656994	104656995	.	.	+
chr10	104953008	104953072	.	.	-
chr10	105091712	105091713	.	.	-
chr10	105156184	105156282	.	.	-
chr10	105156361	105156434	.	.	+
chr10	105315041	105315109	.	.	+
chr10	105677820	105678049	.	.	-
chr10	105881277	105881627	.	.	-
chr10	106014467	106014871	.	.	+
chr10	106028655	106028788	.	.	-
chr10	106034630	106034932	.	.	+
chr10	106241160	106241161	.	.	+
chr10	107841552	107841553	.	.	+
chr10	1094822	1095307	.	.	-
chr10	1095025	1095035	.	.	+
chr10	111260429	111260434	.	.	+
chr10	111674720	111674969	.	.	-
chr10	111682939	111683295	.	.	-
chr10	111767702	111768003	.	.	+
chr10	111987067	111987404	.	.	+
chr10	112064669	112064721	.	.	-
chr10	112327417	112327498	.	.	+
chr10	112631542	112631758	.	.	+
chr10	112678693	112679128	.	.	-
chr10	112679326	112679385	.	.	+
chr10	113153732	113153733	.	.	+
chr10	113943488	113943536	.	.	-
chr10	114206505	114206728	.	.	-
chr10	114206743	114207078	.	.	+
chr10	114709963	114710508	.	.	+
chr10	11537994	11537999	.	.	+
chr10	115412257	115412258	.	.	+
chr10	115439492	115440026	.	.	+
chr10	115933537	115934087	.	.	-
chr10	116286544	116286688	.	.	-
chr10	116391581	116391870	.	.	-
chr10	116697951	116698216	.	.	+
chr10	118305291	118305645	.	.	+
chr10	118306801	118306957	.	.	+
chr10	118307835	118307992	.	.	+
chr10	118310607	118310742	.	.	+
chr10	118312985	118313347	.	.	+
chr10	118314360	118315001	.	.	+
chr10	118315485	118315644	.	.	+
chr10	118349670	118349934	.	.	+
chr10	118349985	118350677	.	.	+
chr10	118368997	118369539	.	.	-
chr10	118373967	118373973	.	.	+
chr10	118380137	118380984	.	.	+
chr10	118609155	118609662	.	.	-
chr10	11865351	11865403	.	.	+
chr10	118764575	118764871	.	.	-
chr10	118999707	118999716	.	.	+
chr10	120101800	120101850	.	.	-
chr10	120839588	120839741	.	.	+
chr10	120839830	120840688	.	.	-
chr10	120863615	120863629	.	.	+
chr10	120924886	120925226	.	.	-
chr10	120938263	120938341	.	.	-
chr10	12110909	12111006	.	.	+
chr10	121157392	121157403	.	.	-
chr10	121356473	121356551	.	.	-
chr10	12137865	12137866	.	.	+
chr10	121519810	121519933	.	.	+
chr10	121578171	121578690	.	.	+
chr10	121652109	121652426	.	.	+
chr10	12171654	12171727	.	.	+
chr10	12237838	12238142	.	.	-
chr10	12237934	12238259	.	.	+
chr10	122483461	122483464	.	.	-
chr10	122610801	122610945	.	.	+
chr10	123372405	123372406	.	.	-
chr10	123914639	123914735	.	.	-
chr10	124134273	124134994	.	.	+
chr10	124596387	124597068	.	.	-
chr10	124598571	124599026	.	.	-
chr10	124605281	124605651	.	.	-
chr10	124768272	124768400	.	.	-
chr10	124768463	124768561	.	.	+
chr10	124913872	124914328	.	.	+
chr10	126107007	126107939	.	.	-
chr10	127408147	127408643	.	.	+
chr10	127480423	127480604	.	.	+
chr10	127512109	127512180	.	.	+
chr10	127523268	127523572	.	.	+
chr10	127585104	127585178	.	.	+
chr10	127586603	127586608	.	.	+
chr10	128593993	128594025	.	.	+
chr10	12943878	12943882	.	.	+
chr10	130434330	130434334	.	.	+
chr10	131265446	131265513	.	.	+
chr10	13141924	13142300	.	.	+
chr10	131677536	131677686	.	.	-
chr10	131934640	131934765	.	.	+
chr10	13341628	13342113	.	.	-
chr10	13344348	13344409	.	.	-
chr10	133468198	133468199	.	.	-
chr10	133795276	133795467	.	.	-
chr10	134973935	134973970	.	.	+
chr10	135122340	135122420	.	.	-
chr10	135150372	135150485	.	.	-
chr10	135186839	135186880	.	.	-
chr10	135207660	135208195	.	.	+
chr10	13628951	13629008	.	.	+
chr10	14032724	14032725	.	.	+
chr10	14341131	14341132	.	.	+
chr10	14879999	14880482	.	.	-
chr10	14880162	14880382	.	.	+
chr10	14920409	14920685	.	.	-
chr10	14996042	14996830	.	.	-
chr10	15067907	15067908	.	.	+
chr10	15413054	15413077	.	.	-
chr10	15902454	15902521	.	.	-
chr10	16478919	16479363	.	.	+
chr10	16859368	16859487	.	.	-
chr10	17271272	17271596	.	.	+
chr10	17686127	17686292	.	.	+
chr10	181446	181480	.	.	+
chr10	18180713	18180745	.	.	+
chr10	18429608	18430043	.	.	+
chr10	18579840	18580130	.	.	+
chr10	18940483	18940562	.	.	-
chr10	22605287	22605634	.	.	+
chr10	22634398	22634650	.	.	+
chr10	23002047	23002049	.	.	-
chr10	23062356	23062357	.	.	+
chr10	24497693	24498092	.	.	+
chr10	24755060	24755772	.	.	+
chr10	25013422	25013587	.	.	-
chr10	25305522	25306026	.	.	+
chr10	26222855	26223420	.	.	+
chr10	26504786	26505725	.	.	+
chr10	26507001	26507361	.	.	+
chr10	26675988	26675989	.	.	-
chr10	26792417	26792418	.	.	+
chr10	27149786	27150011	.	.	-
chr10	27443124	27443349	.	.	-
chr10	27444030	27444209	.	.	-
chr10	27529343	27529767	.	.	-
chr10	27793111	27793286	.	.	+
chr10	28821661	28821791	.	.	+
chr10	28966449	28966455	.	.	+
chr10	29698428	29698597	.	.	+
chr10	29883625	29883628	.	.	-
chr10	30024724	30024792	.	.	-
chr10	30956684	30956685	.	.	-
chr10	3109278	3109766	.	.	+
chr10	31607776	31608159	.	.	+
chr10	32048810	32049057	.	.	-
chr10	3214916	3215121	.	.	-
chr10	32217648	32217759	.	.	-
chr10	32301988	32301993	.	.	-
chr10	32345012	32345379	.	.	-
chr10	32381503	32381875	.	.	-
chr10	32447936	32448007	.	.	-
chr10	32472948	32472952	.	.	-
chr10	32494204	32494215	.	.	-
chr10	32513088	32513112	.	.	-
chr10	32547079	32547081	.	.	-
chr10	32635983	32636146	.	.	-
chr10	32667613	32667726	.	.	-
chr10	3313350	3313352	.	.	-
chr10	33247096	33247158	.	.	-
chr10	33269608	33269824	.	.	+
chr10	33271453	33271509	.	.	+
chr10	33594859	33594860	.	.	-
chr10	33623299	33623851	.	.	-
chr10	3373049	3373050	.	.	+
chr10	34886649	34886652	.	.	+
chr10	35379246	35379542	.	.	-
chr10	35415741	35416101	.	.	+
chr10	35484058	35484463	.	.	+
chr10	37586520	37586521	.	.	+
chr10	38146188	38146988	.	.	-
chr10	38265163	38265575	.	.	-
chr10	3827118	3827478	.	.	-
chr10	38299546	38299663	.	.	+
chr10	38383262	38383832	.	.	+
chr10	38645304	38645344	.	.	+
chr10	43048194	43048280	.	.	-
chr10	43133541	43134064	.	.	-
chr10	43277925	43278303	.	.	+
chr10	43535726	43535727	.	.	+
chr10	43892191	43892932	.	.	-
chr10	43900822	43900823	.	.	+
chr10	43903219	43903263	.	.	-
chr10	43904277	43904696	.	.	-
chr10	43932285	43932654	.	.	+
chr10	44032623	44032870	.	.	+
chr10	44101383	44101384	.	.	+
chr10	45455183	45455486	.	.	+
chr10	45472909	45473431	.	.	-
chr10	45473910	45474260	.	.	-
chr10	45495962	45496645	.	.	+
chr10	45869638	45869795	.	.	+
chr10	46089704	46090355	.	.	-
chr10	46222673	46222731	.	.	+
chr10	47243486	47243511	.	.	-
chr10	5005603	5005640	.	.	+
chr10	50449128	50449275	.	.	+
chr10	5046047	5046094	.	.	-
chr10	50747069	50747171	.	.	-
chr10	50970327	50970372	.	.	-
chr10	5136567	5136653	.	.	+
chr10	51565161	51565260	.	.	+
chr10	51572243	51572467	.	.	+
chr10	51623285	51623351	.	.	-
chr10	51827659	51828138	.	.	+
chr10	52382739	52383659	.	.	-
chr10	52499564	52499769	.	.	+
chr10	52645061	52645454	.	.	-
chr10	53459332	53459378	.	.	-
chr10	53472141	53472142	.	.	-
chr10	5406846	5407154	.	.	+
chr10	5488369	5488602	.	.	+
chr10	560048	560167	.	.	-
chr10	5855256	5855444	.	.	-
chr10	59125111	59125113	.	.	+
chr10	60028824	60029019	.	.	+
chr10	60144882	60145235	.	.	+
chr10	60897644	60897645	.	.	+
chr10	60936378	60936601	.	.	+
chr10	61043323	61043439	.	.	-
chr10	61122247	61122354	.	.	-
chr10	61633090	61633580	.	.	+
chr10	6186881	6186927	.	.	+
chr10	6244543	6245173	.	.	+
chr10	62493164	62493274	.	.	-
chr10	62704117	62704200	.	.	+
chr10	62704442	62704508	.	.	-
chr10	63070915	63070916	.	.	+
chr10	63661442	63661459	.	.	+
chr10	63663545	63663622	.	.	-
chr10	63808690	63809210	.	.	+
chr10	64133704	64134199	.	.	+
chr10	64893014	64893164	.	.	+
chr10	64973898	64974613	.	.	-
chr10	65028421	65029054	.	.	-
chr10	65225378	65225754	.	.	-
chr10	65389811	65390145	.	.	-
chr10	65662783	65663031	.	.	-
chr10	66284763	66284764	.	.	-
chr10	68685763	68685923	.	.	+
chr10	695918	696299	.	.	+
chr10	69597713	69597979	.	.	-
chr10	69641512	69641513	.	.	-
chr10	69834950	69835095	.	.	-
chr10	7007130	7007131	.	.	+
chr10	70091458	70092028	.	.	+
chr10	70166608	70167058	.	.	-
chr10	70167668	70167669	.	.	-
chr10	70259245	70259247	.	.	+
chr10	70480834	70481285	.	.	+
chr10	70661024	70661137	.	.	+
chr10	70715881	70716414	.	.	+
chr10	70847800	70847942	.	.	+
chr10	70883931	70884008	.	.	+
chr10	70939628	70940074	.	.	+
chr10	70980086	70980089	.	.	+
chr10	7129355	7129356	.	.	-
chr10	71389994	71390032	.	.	+
chr10	71892379	71892609	.	.	-
chr10	71930023	71930634	.	.	-
chr10	71992785	71993188	.	.	-
chr10	72142368	72142385	.	.	-
chr10	72648304	72648349	.	.	-
chr10	73528086	73528091	.	.	-
chr10	73577008	73577233	.	.	-
chr10	73610941	73611425	.	.	-
chr10	73975652	73976068	.	.	-
chr10	73975754	73975872	.	.	+
chr10	74033392	74033974	.	.	+
chr10	74114657	74114742	.	.	-
chr10	74130997	74131014	.	.	+
chr10	74169319	74169322	.	.	+
chr10	74385713	74385890	.	.	-
chr10	74856290	74856769	.	.	-
chr10	74870212	74870285	.	.	+
chr10	74880549	74880550	.	.	+
chr10	74927565	74927836	.	.	-
chr10	75007006	75007068	.	.	-
chr10	75012156	75012453	.	.	-
chr10	75173375	75173848	.	.	-
chr10	75255334	75255589	.	.	-
chr10	75490024	75490560	.	.	+
chr10	75490216	75490264	.	.	-
chr10	75504029	75504182	.	.	+
chr10	75532707	75532908	.	.	+
chr10	75602066	75602428	.	.	-
chr10	75649154	75649155	.	.	+
chr10	75757562	75757901	.	.	+
chr10	75910530	75910823	.	.	-
chr10	75930409	75930411	.	.	+
chr10	75936480	75936980	.	.	+
chr10	76351772	76351773	.	.	+
chr10	76780405	76780406	.	.	-
chr10	76803202	76803203	.	.	-
chr10	76871371	76871534	.	.	+
chr10	76957094	76957095	.	.	+
chr10	76970348	76970618	.	.	+
chr10	78215760	78215762	.	.	+
chr10	7829736	7829961	.	.	-
chr10	7830061	7830181	.	.	+
chr10	7860467	7860490	.	.	+
chr10	78743959	78744451	.	.	+
chr10	79663039	79663040	.	.	+
chr10	79789249	79789303	.	.	-
chr10	79793507	79794067	.	.	+
chr10	80412028	80412128	.	.	+
chr10	80412142	80412145	.	.	-
chr10	81002413	81002817	.	.	+
chr10	81833999	81834001	.	.	-
chr10	81838420	81838566	.	.	+
chr10	81961343	81961347	.	.	-
chr10	82167953	82168375	.	.	+
chr10	85022406	85022408	.	.	-
chr10	85899195	85899341	.	.	+
chr10	86469900	86469902	.	.	+
chr10	88515510	88515634	.	.	+
chr10	88728170	88728241	.	.	+
chr10	88730932	88731026	.	.	-
chr10	88731723	88731985	.	.	-
chr10	88854490	88854982	.	.	+
chr10	89102034	89102150	.	.	-
chr10	89264631	89264709	.	.	+
chr10	89419267	89419911	.	.	+
chr10	89574369	89574370	.	.	-
chr10	89577582	89578426	.	.	-
chr10	90342969	90343084	.	.	-
chr10	90712526	90712531	.	.	-
chr10	91011521	91011870	.	.	-
chr10	91152372	91152401	.	.	+
chr10	91174157	91174538	.	.	+
chr10	91295301	91295522	.	.	-
chr10	92631708	92631749	.	.	+
chr10	92922771	92922830	.	.	+
chr10	92980471	92980563	.	.	+
chr10	93169025	93169480	.	.	+
chr10	93392798	93392897	.	.	-
chr10	94050699	94050954	.	.	-
chr10	94051069	94051132	.	.	+
chr10	94219079	94219098	.	.	+
chr10	94333341	94333850	.	.	-
chr10	94608224	94608351	.	.	+
chr10	95044349	95044351	.	.	-
chr10	95241976	95242352	.	.	-
chr10	95360338	95361223	.	.	-
chr10	96028344	96028883	.	.	+
chr10	96122666	96122725	.	.	-
chr10	96147289	96147290	.	.	+
chr10	96975840	96975841	.	.	+
chr10	97050628	97050783	.	.	-
chr10	97199241	97199242	.	.	-
chr10	97321111	97321181	.	.	-
chr10	97416257	97416763	.	.	-
chr10	97453620	97453742	.	.	-
chr10	98141122	98141124	.	.	-
chr10	98510020	98510187	.	.	+
chr10	98592006	98592085	.	.	+
chr10	98592690	98593131	.	.	+
chr10	98645788	98645798	.	.	-
chr10	99022279	99022756	.	.	+
chr10	99052386	99052815	.	.	-
chr10	99160818	99161115	.	.	-
chr10	99185906	99186030	.	.	+
chr10	99197504	99197511	.	.	-
chr10	99205348	99205774	.	.	-
chr10	99258143	99258212	.	.	-
chr10	99393216	99393263	.	.	-
chr10	99446900	99447049	.	.	-
chr10	99496863	99496970	.	.	+
chr10	99582103	99582207	.	.	+
chr10	99894381	99894667	.	.	+
chr1	10003353	10003449	.	.	-
chr1	10003477	10003547	.	.	+
chr1	100232181	100232194	.	.	-
chr1	100503650	100503750	.	.	+
chr1	100598313	100598725	.	.	+
chr1	100694871	100694887	.	.	-
chr1	100731721	100732164	.	.	+
chr1	100818009	100818728	.	.	+
chr1	10093001	10093596	.	.	+
chr1	101185220	101185715	.	.	+
chr1	101361316	101361812	.	.	+
chr1	101491337	101491352	.	.	-
chr1	101702323	101702579	.	.	+
chr1	102378225	102378226	.	.	+
chr1	103362476	103362479	.	.	+
chr1	104068296	104068880	.	.	+
chr1	104113767	104114257	.	.	+
chr1	10459077	10459165	.	.	+
chr1	10490781	10490854	.	.	+
chr1	10532297	10532633	.	.	-
chr1	10534998	10535020	.	.	+
chr1	105816435	105816437	.	.	-
chr1	109234823	109235216	.	.	+
chr1	109289247	109289348	.	.	+
chr1	109506034	109506142	.	.	-
chr1	109618571	109618932	.	.	-
chr1	109632924	109633606	.	.	+
chr1	109642687	109643150	.	.	+
chr1	109656495	109656931	.	.	+
chr1	109756492	109757013	.	.	+
chr1	1098205	1098360	.	.	+
chr1	109837269	109837680	.	.	-
chr1	109968990	109969430	.	.	-
chr1	110036683	110036749	.	.	+
chr1	110091049	110091131	.	.	-
chr1	110091194	110091345	.	.	+
chr11	101000288	101000714	.	.	-
chr1	110162431	110162588	.	.	+
chr1	110163687	110163929	.	.	+
chr11	1016837	1018724	.	.	-
chr11	101785731	101786093	.	.	+
chr1	11018748	11018965	.	.	-
chr11	1019171	1019483	.	.	-
chr11	101918033	101918187	.	.	+
chr1	110198325	110198984	.	.	+
chr1	110210641	110210726	.	.	+
chr11	102188207	102188283	.	.	+
chr11	102217628	102218250	.	.	+
chr11	102323068	102323460	.	.	-
chr11	102401327	102401539	.	.	-
chr11	102668781	102668894	.	.	-
chr1	110282551	110283048	.	.	-
chr11	102962726	102962935	.	.	-
chr11	102980083	102980284	.	.	+
chr11	103037532	103037533	.	.	+
chr11	10326510	10326772	.	.	+
chr11	1036707	1036720	.	.	-
chr11	10476577	10476996	.	.	+
chr11	10477466	10477865	.	.	-
chr11	10477602	10477939	.	.	+
chr11	104839243	104839359	.	.	-
chr11	105145313	105145320	.	.	-
chr1	110527386	110527899	.	.	+
chr11	10562282	10562785	.	.	-
chr11	105892643	105893014	.	.	-
chr11	105947652	105948332	.	.	-
chr11	105948307	105948434	.	.	+
chr11	106047754	106047973	.	.	+
chr1	11072681	11072751	.	.	+
chr11	10772462	10772825	.	.	+
chr11	107799145	107799337	.	.	+
chr11	107879601	107880077	.	.	+
chr11	107992244	107992326	.	.	+
chr11	108093289	108093386	.	.	-
chr11	108093514	108094244	.	.	+
chr11	10823317	10823973	.	.	-
chr11	10830254	10830904	.	.	-
chr11	108338153	108338235	.	.	-
chr11	108535779	108535858	.	.	+
chr11	10879342	10879620	.	.	-
chr11	10879747	10880046	.	.	+
chr1	110882043	110882116	.	.	+
chr1	110950038	110950376	.	.	-
chr1	110952117	110952121	.	.	+
chr11	111473139	111473288	.	.	+
chr11	111636643	111637143	.	.	-
chr11	111742003	111742306	.	.	-
chr11	111749615	111750230	.	.	-
chr11	111750189	111750267	.	.	+
chr11	111782328	111782667	.	.	-
chr11	111789632	111790000	.	.	+
chr11	111895865	111896468	.	.	+
chr11	111944815	111945049	.	.	+
chr11	111957318	111957638	.	.	+
chr11	111957456	111957529	.	.	-
chr11	112034810	112034819	.	.	-
chr11	112096781	112097400	.	.	+
chr11	112831969	112832227	.	.	+
chr11	113526348	113526663	.	.	+
chr11	113637249	113637254	.	.	+
chr11	113641393	113641743	.	.	+
chr11	113644394	113644803	.	.	-
chr11	113663433	113663434	.	.	+
chr11	113713157	113713160	.	.	+
chr11	113717570	113717571	.	.	+
chr11	113723498	113723913	.	.	+
chr11	113731394	113731697	.	.	+
chr11	113734816	113735290	.	.	+
chr11	113930274	113930620	.	.	+
chr11	114167028	114167249	.	.	+
chr11	114271093	114271284	.	.	-
chr11	114271252	114271759	.	.	+
chr11	114309955	114310579	.	.	+
chr1	111506528	111506731	.	.	-
chr11	115158191	115158251	.	.	-
chr11	115320252	115320258	.	.	+
chr11	115374759	115375174	.	.	-
chr11	11584484	11584491	.	.	+
chr1	11159891	11159962	.	.	-
chr11	116150611	116150612	.	.	+
chr11	11643551	11643558	.	.	-
chr11	116643692	116643760	.	.	-
chr1	111682376	111682786	.	.	-
chr1	111682428	111682877	.	.	+
chr11	117070023	117070119	.	.	+
chr11	117102757	117103260	.	.	-
chr11	117198569	117198867	.	.	+
chr11	117695032	117695756	.	.	-
chr11	117698725	117698899	.	.	-
chr11	117699539	117699627	.	.	+
chr11	117708408	117708462	.	.	+
chr11	117747123	117747752	.	.	-
chr11	117937952	117937959	.	.	+
chr11	118122639	118123080	.	.	-
chr11	118230292	118230667	.	.	+
chr11	118245862	118246241	.	.	-
chr11	118272079	118272526	.	.	+
chr11	118273560	118273563	.	.	-
chr11	118353153	118353207	.	.	-
chr11	118401906	118401939	.	.	+
chr11	118436604	118436765	.	.	-
chr11	118443065	118443189	.	.	+
chr11	118478305	118478347	.	.	+
chr11	11863155	11863601	.	.	+
chr11	118661608	118661923	.	.	-
chr11	118719004	118719006	.	.	-
chr11	118754351	118754353	.	.	-
chr11	118868367	118868895	.	.	+
chr1	111888896	111889491	.	.	+
chr11	118889023	118889399	.	.	-
chr11	118889438	118889557	.	.	+
chr11	118900120	118900234	.	.	-
chr11	118901493	118901608	.	.	-
chr11	118927525	118927942	.	.	-
chr11	118928147	118928346	.	.	+
chr11	118938287	118938705	.	.	+
chr11	118955561	118955662	.	.	+
chr11	118972529	118972594	.	.	-
chr11	118978062	118978178	.	.	+
chr11	118992285	118992581	.	.	+
chr11	119187821	119188326	.	.	-
chr11	119205218	119205389	.	.	+
chr11	119293876	119293912	.	.	-
chr1	111991502	111992321	.	.	-
chr1	111991700	111992195	.	.	+
chr11	120276823	120276846	.	.	+
chr11	121023902	121024022	.	.	-
chr11	121163364	121163625	.	.	+
chr11	121217958	121218473	.	.	+
chr11	121323022	121323446	.	.	+
chr1	112162410	112162507	.	.	+
chr11	121971128	121971169	.	.	-
chr11	122565379	122565677	.	.	+
chr11	122930191	122930972	.	.	-
chr11	122932504	122933224	.	.	-
chr11	122933188	122933374	.	.	+
chr11	123986101	123986474	.	.	+
chr11	12399138	12399192	.	.	+
chr11	124492741	124492832	.	.	+
chr11	125034601	125034651	.	.	+
chr11	125131662	125131678	.	.	+
chr11	125462724	125462977	.	.	+
chr11	125757562	125757618	.	.	+
chr11	125773032	125773116	.	.	-
chr11	125983685	125983736	.	.	+
chr11	126081537	126081560	.	.	-
chr11	126081663	126081704	.	.	+
chr11	126138683	126138854	.	.	-
chr11	126870664	126870706	.	.	-
chr11	127811656	127811749	.	.	-
chr11	12797992	12797994	.	.	+
chr11	128391872	128392145	.	.	-
chr11	128894031	128894295	.	.	-
chr1	112938550	112938879	.	.	+
chr11	129685707	129686077	.	.	+
chr11	129765035	129765485	.	.	-
chr11	130114415	130114418	.	.	+
chr11	130786317	130786388	.	.	-
chr11	131556655	131557051	.	.	+
chr1	113161732	113161763	.	.	-
chr1	113162133	113162569	.	.	+
chr1	113217087	113217590	.	.	+
chr1	11322563	11322608	.	.	-
chr1	113249703	113249768	.	.	-
chr1	11333254	11334027	.	.	+
chr11	133938908	133938999	.	.	+
chr11	134095340	134095380	.	.	-
chr11	134123148	134123301	.	.	-
chr11	134201881	134201958	.	.	+
chr11	134252511	134252544	.	.	-
chr11	13484528	13484844	.	.	-
chr1	113498815	113498867	.	.	-
chr1	113615789	113615843	.	.	+
chr1	113638190	113638191	.	.	-
chr11	13690205	13690271	.	.	+
chr1	113933063	113933157	.	.	+
chr1	114302071	114302537	.	.	-
chr1	114303784	114303809	.	.	+
chr1	114354840	114354911	.	.	-
chr1	114447408	114447716	.	.	-
chr11	14521330	14521436	.	.	-
chr11	14541469	14542064	.	.	-
chr1	114987572	114988008	.	.	-
chr1	115124039	115124291	.	.	-
chr1	115212624	115212997	.	.	-
chr1	115259348	115259401	.	.	-
chr1	115300370	115300911	.	.	-
chr1	115323083	115323524	.	.	-
chr1	115632077	115632114	.	.	-
chr11	15841381	15841382	.	.	-
chr11	16332606	16332607	.	.	+
chr11	16419040	16419341	.	.	-
chr1	1167290	1167447	.	.	-
chr11	16760147	16760672	.	.	+
chr11	16863798	16863942	.	.	+
chr1	116915864	116916087	.	.	+
chr11	16996586	16996847	.	.	-
chr11	17035920	17035977	.	.	-
chr11	17098734	17099268	.	.	-
chr1	117113610	117113685	.	.	-
chr1	11714538	11714961	.	.	+
chr11	17229418	17229559	.	.	-
chr11	17229624	17230124	.	.	+
chr11	17298253	17298588	.	.	+
chr11	17373309	17373569	.	.	+
chr1	11740552	11741198	.	.	-
chr11	17429935	17430003	.	.	-
chr11	17434851	17435241	.	.	-
chr11	17498291	17498826	.	.	-
chr11	17565905	17565980	.	.	-
chr1	117602924	117603178	.	.	+
chr1	117753501	117753549	.	.	-
chr11	1784687	1785209	.	.	-
chr1	117910104	117910505	.	.	+
chr1	11796132	11796247	.	.	+
chr11	18033987	18034570	.	.	-
chr11	18128173	18128174	.	.	+
chr1	118148668	118148949	.	.	+
chr11	18343678	18344050	.	.	-
chr11	18343813	18344269	.	.	+
chr11	18415934	18416146	.	.	+
chr1	118472200	118472285	.	.	-
chr1	118472357	118472593	.	.	+
chr11	18548373	18548506	.	.	-
chr11	18610215	18610482	.	.	-
chr1	11865529	11866043	.	.	-
chr11	18655761	18656380	.	.	-
chr1	11866158	11866518	.	.	+
chr11	18728537	18728578	.	.	-
chr11	19138649	19138959	.	.	+
chr1	11968207	11968210	.	.	+
chr1	119682867	119683294	.	.	-
chr11	1968538	1968590	.	.	+
chr1	11994745	11994815	.	.	+
chr1	120254502	120254636	.	.	+
chr1	120342106	120342625	.	.	-
chr1	12040304	12040508	.	.	+
chr11	207344	207407	.	.	-
chr11	207481	207719	.	.	+
chr1	120837971	120838365	.	.	-
chr11	208785	208841	.	.	+
chr1	120905972	120905999	.	.	+
chr11	2152804	2153644	.	.	-
chr11	21569690	21570000	.	.	-
chr11	2159469	2159878	.	.	-
chr11	2181016	2181208	.	.	+
chr11	2181046	2181414	.	.	-
chr11	2181944	2182495	.	.	-
chr11	22359283	22359561	.	.	+
chr11	22646798	22647389	.	.	-
chr11	22851346	22851408	.	.	-
chr1	12290088	12290156	.	.	+
chr11	2290308	2290499	.	.	-
chr11	2292771	2292772	.	.	-
chr11	2338834	2339001	.	.	-
chr11	236545	237035	.	.	+
chr11	2421902	2422261	.	.	+
chr1	1242528	1242529	.	.	+
chr1	1259999	1260068	.	.	-
chr1	12677239	12677699	.	.	-
chr1	12678651	12679158	.	.	-
chr11	27490717	27490826	.	.	+
chr11	27528101	27528343	.	.	-
chr11	28129888	28129943	.	.	+
chr11	28131531	28131878	.	.	+
chr11	287699	288307	.	.	+
chr11	2906633	2907008	.	.	-
chr11	2950627	2950655	.	.	-
chr11	3012899	3013999	.	.	-
chr11	30344628	30344701	.	.	+
chr11	3078408	3078677	.	.	-
chr11	307921	308333	.	.	+
chr1	1310558	1310598	.	.	-
chr11	31391272	31391321	.	.	-
chr11	31391359	31391563	.	.	+
chr11	314016	314126	.	.	+
chr11	31531068	31531479	.	.	+
chr11	31531103	31531180	.	.	-
chr11	31825218	31825788	.	.	-
chr11	31832481	31832879	.	.	-
chr11	31839435	31839675	.	.	-
chr11	320669	320912	.	.	-
chr11	32605340	32605434	.	.	+
chr11	33182996	33183037	.	.	-
chr11	33231145	33231146	.	.	-
chr11	33278898	33278976	.	.	+
chr11	33279840	33280323	.	.	+
chr1	1334928	1335011	.	.	+
chr11	33757573	33758032	.	.	-
chr11	33795869	33796077	.	.	-
chr11	33912813	33912845	.	.	-
chr11	3400331	3400444	.	.	-
chr11	34127052	34127311	.	.	+
chr1	1342455	1342683	.	.	-
chr11	34379546	34379557	.	.	-
chr11	34460323	34460535	.	.	+
chr11	34642592	34642752	.	.	+
chr11	34645766	34645858	.	.	+
chr11	34937607	34937958	.	.	-
chr11	34937967	34938213	.	.	+
chr11	3498237	3498299	.	.	-
chr11	35160221	35160614	.	.	-
chr11	35160249	35161208	.	.	+
chr11	35211420	35211520	.	.	+
chr11	35250492	35250964	.	.	+
chr11	35965611	35966091	.	.	+
chr11	36310922	36310991	.	.	-
chr11	36531778	36531842	.	.	-
chr11	37008826	37008828	.	.	+
chr11	37301133	37301134	.	.	+
chr11	3818737	3818784	.	.	-
chr11	3819127	3819447	.	.	+
chr11	38596616	38596617	.	.	+
chr11	3862159	3862212	.	.	-
chr1	14106343	14107473	.	.	+
chr11	4115820	4116094	.	.	+
chr1	1413227	1413275	.	.	+
chr11	417338	417397	.	.	-
chr1	14322696	14322698	.	.	+
chr11	43333469	43333614	.	.	+
chr11	43380468	43380814	.	.	+
chr11	43600404	43600971	.	.	+
chr11	43701980	43702378	.	.	+
chr11	43902298	43902646	.	.	+
chr1	143913810	143913823	.	.	+
chr11	4414897	4414944	.	.	-
chr11	441946	442146	.	.	-
chr1	144520984	144521238	.	.	-
chr11	44587125	44587220	.	.	+
chr1	144593676	144594007	.	.	+
chr1	144931768	144932486	.	.	-
chr1	144944671	144944673	.	.	+
chr1	145039611	145040029	.	.	-
chr1	145096292	145096583	.	.	+
chr11	45307456	45307864	.	.	-
chr1	145438437	145439069	.	.	+
chr1	145470358	145470420	.	.	-
chr1	145507496	145507886	.	.	+
chr1	145516181	145516387	.	.	+
chr1	145575261	145575291	.	.	+
chr1	145575987	145576071	.	.	+
chr1	145610874	145611095	.	.	-
chr1	145826938	145827103	.	.	-
chr11	45939379	45939678	.	.	-
chr11	46142504	46143060	.	.	-
chr11	46299163	46299625	.	.	+
chr11	46383077	46383163	.	.	+
chr11	46402442	46402821	.	.	+
chr11	46403254	46403586	.	.	+
chr1	146556039	146556304	.	.	-
chr11	46615186	46615630	.	.	-
chr11	46638822	46639202	.	.	+
chr1	146643736	146644168	.	.	-
chr1	146644274	146644815	.	.	+
chr1	146714012	146714765	.	.	+
chr11	46721877	46722246	.	.	-
chr11	46722576	46722612	.	.	+
chr11	46867476	46867849	.	.	-
chr11	46958268	46958778	.	.	+
chr1	147013270	147013415	.	.	+
chr1	147071420	147071461	.	.	-
chr1	147084446	147084839	.	.	+
chr1	147142262	147142651	.	.	-
chr11	47198405	47198479	.	.	-
chr11	47236492	47236654	.	.	+
chr11	47270138	47270390	.	.	-
chr11	47291206	47291735	.	.	+
chr1	147400426	147400578	.	.	+
chr11	47447712	47448017	.	.	-
chr11	47600207	47600540	.	.	-
chr11	47600563	47600649	.	.	+
chr11	4765036	4765476	.	.	-
chr11	47664028	47664144	.	.	-
chr1	147806888	147806891	.	.	-
chr11	47869867	47870028	.	.	-
chr1	147994144	147994327	.	.	+
chr1	148193282	148193338	.	.	+
chr1	148241463	148241700	.	.	+
chr1	149145432	149145433	.	.	-
chr1	149223758	149224396	.	.	-
chr1	149399054	149399230	.	.	-
chr1	149425367	149425368	.	.	+
chr1	149514238	149514256	.	.	-
chr1	149783752	149783984	.	.	-
chr1	149785065	149785250	.	.	-
chr1	149857960	149858244	.	.	-
chr1	149858414	149858895	.	.	+
chr1	149859319	149859577	.	.	-
chr1	149871120	149871547	.	.	+
chr11	49885964	49885980	.	.	+
chr1	149889367	149889436	.	.	-
chr1	149899656	149899712	.	.	-
chr1	149899754	149899823	.	.	+
chr1	149908225	149908607	.	.	-
chr1	149908738	149908775	.	.	-
chr1	150019777	150019799	.	.	+
chr1	150039425	150039917	.	.	+
chr1	150208316	150208524	.	.	-
chr1	150241116	150241475	.	.	-
chr1	150254922	150255287	.	.	+
chr1	150265899	150266342	.	.	+
chr1	150293925	150294023	.	.	+
chr1	150336593	150337344	.	.	+
chr1	150386439	150386893	.	.	+
chr1	150408929	150408935	.	.	+
chr1	150418396	150418871	.	.	+
chr1	150427194	150427195	.	.	+
chr1	150459875	150459922	.	.	+
chr1	150497814	150497815	.	.	+
chr1	150509886	150509915	.	.	+
chr1	150548399	150548957	.	.	-
chr1	150551443	150552150	.	.	-
chr1	150554201	150554208	.	.	+
chr1	150568061	150568063	.	.	+
chr1	150571445	150571446	.	.	+
chr1	150601521	150602109	.	.	-
chr1	150616232	150616254	.	.	-
chr1	150669561	150669690	.	.	-
chr11	506766	507286	.	.	-
chr1	150713025	150713030	.	.	-
chr1	150738192	150738434	.	.	-
chr1	150848832	150849220	.	.	-
chr1	150898771	150898922	.	.	+
chr1	150947121	150947222	.	.	-
chr1	150978864	150979378	.	.	-
chr1	150980892	150981033	.	.	+
chr1	1509957	1510047	.	.	-
chr1	150998119	150998120	.	.	-
chr1	151020176	151020324	.	.	+
chr1	151032045	151032134	.	.	-
chr1	151032740	151032983	.	.	+
chr1	151096181	151096182	.	.	+
chr1	151138516	151138628	.	.	+
chr1	151146545	151146547	.	.	+
chr1	151162620	151162677	.	.	-
chr1	151171000	151171545	.	.	+
chr1	151227192	151227511	.	.	+
chr1	151254742	151255125	.	.	+
chr1	151299437	151300117	.	.	-
chr1	151309721	151309723	.	.	+
chr1	151319329	151319758	.	.	-
chr1	151372005	151372527	.	.	+
chr1	151415815	151415816	.	.	+
chr1	151431624	151431700	.	.	-
chr1	151480352	151480354	.	.	-
chr1	151512758	151513041	.	.	+
chr1	151689136	151689291	.	.	-
chr1	151735825	151735979	.	.	-
chr1	151804223	151804335	.	.	-
chr1	151965139	151965440	.	.	+
chr1	151966263	151966335	.	.	-
chr1	152009392	152009511	.	.	-
chr1	153029987	153029989	.	.	-
chr1	153508346	153508798	.	.	-
chr1	153539257	153539310	.	.	+
chr1	153581478	153581512	.	.	-
chr1	153585455	153585646	.	.	-
chr1	153588789	153588814	.	.	-
chr1	153599714	153600098	.	.	-
chr1	153606496	153606983	.	.	+
chr1	153631137	153631479	.	.	+
chr1	153643416	153643504	.	.	-
chr1	153675838	153675848	.	.	+
chr1	153700525	153700552	.	.	+
chr1	153930718	153931088	.	.	-
chr1	153935797	153936222	.	.	-
chr1	153936172	153936215	.	.	+
chr1	153958721	153958871	.	.	-
chr1	153963089	153963456	.	.	+
chr1	154064702	154064703	.	.	-
chr1	154119953	154119954	.	.	-
chr1	154155605	154155796	.	.	-
chr1	154192852	154193277	.	.	-
chr1	154193220	154193838	.	.	+
chr1	154245061	154245524	.	.	+
chr1	154249976	154249977	.	.	-
chr1	154378362	154378974	.	.	+
chr1	154378393	154378658	.	.	-
chr1	154600366	154600476	.	.	-
chr1	15479061	15479228	.	.	+
chr1	154909095	154909494	.	.	-
chr1	154928271	154928639	.	.	-
chr1	154942847	154943287	.	.	-
chr1	154946804	154946882	.	.	-
chr1	154947135	154947178	.	.	+
chr1	154955793	154955844	.	.	+
chr1	154975093	154975326	.	.	+
chr1	154997967	154997968	.	.	-
chr1	155099871	155100722	.	.	+
chr1	155107850	155108769	.	.	+
chr1	155112974	155113045	.	.	-
chr1	155145366	155145809	.	.	-
chr1	155147063	155147081	.	.	+
chr1	155160834	155161581	.	.	+
chr1	155161019	155161220	.	.	-
chr1	155161679	155161808	.	.	-
chr1	155162673	155162765	.	.	-
chr1	155178565	155179065	.	.	+
chr1	155214240	155214482	.	.	-
chr1	155231965	155232224	.	.	-
chr1	155278630	155278770	.	.	+
chr1	155290676	155290754	.	.	+
chr1	155532194	155532928	.	.	-
chr1	155532760	155533139	.	.	+
chr1	155658098	155658793	.	.	-
chr1	155658835	155658916	.	.	+
chr1	155826964	155827047	.	.	-
chr1	155829185	155829427	.	.	+
chr1	155880746	155881213	.	.	-
chr1	155904163	155904227	.	.	-
chr1	155947965	155948727	.	.	-
chr1	155990395	155991190	.	.	-
chr1	156024524	156024874	.	.	+
chr1	156030801	156031139	.	.	+
chr1	156060701	156060702	.	.	+
chr11	560719	560738	.	.	-
chr1	156084130	156084939	.	.	+
chr11	560964	561016	.	.	+
chr1	156163872	156164282	.	.	+
chr1	156182779	156183129	.	.	+
chr1	156265435	156265480	.	.	-
chr1	156299259	156299260	.	.	-
chr1	156307943	156308204	.	.	-
chr1	156368691	156368692	.	.	-
chr11	56457679	56457744	.	.	+
chr1	156561562	156561641	.	.	+
chr1	156571235	156571274	.	.	-
chr1	156675373	156675376	.	.	-
chr1	156698155	156698260	.	.	-
chr1	156710683	156710944	.	.	-
chr1	156718150	156718617	.	.	-
chr1	156737289	156737450	.	.	+
chr11	57089778	57090141	.	.	-
chr1	157108141	157108398	.	.	-
chr11	57194548	57194907	.	.	-
chr11	572445	572744	.	.	-
chr11	57282289	57282649	.	.	-
chr11	57298175	57298238	.	.	-
chr11	57335096	57335180	.	.	-
chr11	57364989	57365232	.	.	+
chr11	57365665	57365726	.	.	+
chr11	57425227	57425245	.	.	+
chr11	57435295	57435590	.	.	+
chr11	57480024	57480088	.	.	+
chr11	57508810	57509061	.	.	+
chr11	57529232	57529744	.	.	+
chr1	15764865	15764992	.	.	+
chr1	15766794	15767080	.	.	+
chr1	15783153	15783641	.	.	+
chr1	15789244	15789352	.	.	+
chr1	15789884	15789995	.	.	+
chr1	15802549	15802984	.	.	+
chr1	158120234	158120235	.	.	+
chr11	58345329	58345773	.	.	-
chr1	15850682	15850759	.	.	-
chr1	15853063	15853384	.	.	+
chr1	1590400	1590670	.	.	-
chr11	592078	592079	.	.	-
chr1	15929927	15930168	.	.	-
chr1	15931022	15931044	.	.	+
chr11	59578163	59578409	.	.	-
chr1	159684373	159684461	.	.	-
chr1	159893128	159893565	.	.	-
chr1	159893649	159894002	.	.	+
chr1	159894097	159894400	.	.	-
chr1	159894462	159894591	.	.	+
chr1	159894884	159895345	.	.	-
chr1	159894948	159895412	.	.	+
chr1	160001312	160001785	.	.	-
chr1	160175173	160175216	.	.	+
chr1	160231962	160232690	.	.	-
chr1	160254724	160254938	.	.	-
chr1	160312739	160313648	.	.	+
chr1	160312962	160313084	.	.	-
chr11	60609161	60609898	.	.	+
chr11	60623409	60623462	.	.	-
chr11	60673900	60674088	.	.	-
chr11	60677101	60677102	.	.	+
chr11	60681353	60681723	.	.	+
chr11	60928187	60929141	.	.	-
chr11	60929224	60929251	.	.	+
chr1	160990624	160991297	.	.	+
chr1	160990661	160991239	.	.	-
chr1	161008694	161008793	.	.	-
chr1	161015685	161015767	.	.	-
chr1	161059256	161059393	.	.	-
chr1	161087412	161087859	.	.	-
chr11	61100385	61101018	.	.	-
chr11	61100694	61100747	.	.	+
chr1	161102116	161102437	.	.	-
chr1	161123543	161124207	.	.	+
chr11	61129340	61129799	.	.	-
chr11	61129443	61129897	.	.	+
chr1	161135822	161136302	.	.	+
chr1	161147247	161147317	.	.	-
chr11	61159889	61160124	.	.	+
chr1	161168405	161168846	.	.	-
chr1	161172137	161172200	.	.	+
chr11	61197256	61197471	.	.	-
chr11	61197505	61197663	.	.	+
chr1	161283820	161284225	.	.	+
chr11	61285169	61285771	.	.	-
chr11	61300548	61301157	.	.	-
chr11	61447874	61447939	.	.	+
chr1	161494140	161494730	.	.	+
chr11	61560039	61560381	.	.	-
chr11	61560256	61560406	.	.	+
chr1	161575960	161575968	.	.	+
chr11	615947	615999	.	.	-
chr11	61595492	61595937	.	.	+
chr11	61599731	61599732	.	.	+
chr1	16161354	16161440	.	.	-
chr1	16162201	16162449	.	.	-
chr1	16162589	16162615	.	.	+
chr1	161719541	161719951	.	.	+
chr11	61734694	61735132	.	.	-
chr1	161736000	161736313	.	.	+
chr11	61891468	61891501	.	.	+
chr11	61976069	61976201	.	.	+
chr1	16218009	16218010	.	.	-
chr11	62192263	62192265	.	.	-
chr11	62341313	62341772	.	.	-
chr11	62341664	62341938	.	.	+
chr11	62358968	62359101	.	.	-
chr11	62389424	62389519	.	.	-
chr11	62414067	62414115	.	.	-
chr11	62432595	62432707	.	.	-
chr11	62432781	62432962	.	.	+
chr11	62439134	62439353	.	.	+
chr11	62446344	62446589	.	.	-
chr11	62473575	62473800	.	.	-
chr11	62476947	62477008	.	.	-
chr11	62495942	62496286	.	.	+
chr11	62528993	62529110	.	.	+
chr1	162531450	162531882	.	.	+
chr11	62538856	62538908	.	.	+
chr11	62554809	62554898	.	.	+
chr11	6255693	6255923	.	.	-
chr11	62572815	62572953	.	.	-
chr11	62599095	62599560	.	.	-
chr11	62607041	62607075	.	.	-
chr11	62609026	62609284	.	.	-
chr11	62622938	62623358	.	.	-
chr11	62623468	62623772	.	.	+
chr11	62648331	62648546	.	.	+
chr1	162760487	162760571	.	.	+
chr1	16302573	16302605	.	.	-
chr1	163038449	163039234	.	.	+
chr1	163172686	163172865	.	.	-
chr1	163291523	163291578	.	.	-
chr11	63381530	63382005	.	.	-
chr11	63438792	63439227	.	.	-
chr11	63448914	63449256	.	.	+
chr11	63655986	63656374	.	.	+
chr11	63706447	63706510	.	.	+
chr11	63741955	63742152	.	.	+
chr11	63753888	63753927	.	.	+
chr11	63953623	63953711	.	.	+
chr11	63993613	63993905	.	.	-
chr11	63993717	63994219	.	.	+
chr11	63998013	63998187	.	.	+
chr11	64008107	64009016	.	.	+
chr11	64008358	64008415	.	.	-
chr11	64012868	64013290	.	.	-
chr11	64013385	64013505	.	.	+
chr11	64052068	64052279	.	.	-
chr11	64084829	64085479	.	.	-
chr11	64085568	64085763	.	.	+
chr11	6411243	6412147	.	.	+
chr11	6411456	6411562	.	.	-
chr11	6426233	6426811	.	.	-
chr11	6439918	6440649	.	.	-
chr11	64497308	64497311	.	.	-
chr1	164528294	164528422	.	.	+
chr11	64545914	64546241	.	.	-
chr11	64684526	64684690	.	.	-
chr11	64703362	64703370	.	.	-
chr1	164761209	164761225	.	.	-
chr11	64781217	64781702	.	.	+
chr11	64794936	64794966	.	.	+
chr1	16481381	16481746	.	.	+
chr11	64851588	64851910	.	.	+
chr11	64863580	64863878	.	.	+
chr11	64879316	64879357	.	.	+
chr11	64889111	64889663	.	.	-
chr11	64889706	64889817	.	.	+
chr11	64901943	64902040	.	.	-
chr11	64915054	64915061	.	.	+
chr11	64948769	64948860	.	.	+
chr11	64949157	64949458	.	.	+
chr11	6502176	6502602	.	.	-
chr11	6502656	6502799	.	.	+
chr11	65061718	65061720	.	.	-
chr11	65082315	65082423	.	.	+
chr11	65101236	65101357	.	.	+
chr11	65149441	65149949	.	.	-
chr11	65153747	65154161	.	.	+
chr11	65185681	65186525	.	.	-
chr11	65186399	65186722	.	.	+
chr11	65187219	65187608	.	.	-
chr11	65187593	65187858	.	.	+
chr11	65188621	65189107	.	.	-
chr11	65188690	65189017	.	.	+
chr11	65189269	65189747	.	.	-
chr11	65190173	65190756	.	.	+
chr11	65190821	65191742	.	.	+
chr11	65192411	65193017	.	.	+
chr11	65193382	65193868	.	.	+
chr11	65194356	65195177	.	.	+
chr11	65195180	65195915	.	.	+
chr11	65196387	65196777	.	.	+
chr11	65196817	65197406	.	.	+
chr11	65197758	65198205	.	.	+
chr11	65199657	65200356	.	.	+
chr11	65200571	65201650	.	.	+
chr11	65202053	65202476	.	.	+
chr11	65203172	65204192	.	.	+
chr11	65204489	65205303	.	.	+
chr11	65205361	65206326	.	.	+
chr11	65209346	65209957	.	.	+
chr11	65210875	65211764	.	.	+
chr11	65239180	65239738	.	.	-
chr11	65244738	65245007	.	.	-
chr11	65265106	65265681	.	.	+
chr11	65266462	65269265	.	.	+
chr11	65269361	65269379	.	.	+
chr11	65269985	65270650	.	.	+
chr11	65270675	65273172	.	.	+
chr11	65337491	65337965	.	.	+
chr11	65381529	65381809	.	.	-
chr11	65383231	65383295	.	.	+
chr1	165414204	165414556	.	.	-
chr11	65430358	65430426	.	.	-
chr11	65430534	65430948	.	.	+
chr11	65479488	65479850	.	.	+
chr11	65487907	65488302	.	.	-
chr1	1655739	1655857	.	.	-
chr1	165600442	165600928	.	.	+
chr11	65625215	65625714	.	.	-
chr11	65627879	65627931	.	.	+
chr11	65655882	65656366	.	.	-
chr1	165667722	165667853	.	.	-
chr11	65686868	65686950	.	.	+
chr1	165737779	165738152	.	.	-
chr11	65769577	65769961	.	.	-
chr11	65769715	65770266	.	.	+
chr11	65819657	65820126	.	.	+
chr11	66035834	66036328	.	.	+
chr11	66056181	66056618	.	.	-
chr11	66056859	66056914	.	.	+
chr11	66112402	66112596	.	.	-
chr11	66115061	66115140	.	.	-
chr11	66188476	66188566	.	.	+
chr11	66206096	66206319	.	.	-
chr11	66247722	66247917	.	.	+
chr11	6624791	6624915	.	.	-
chr11	6624975	6625300	.	.	+
chr11	66278104	66278178	.	.	+
chr11	6635236	6635672	.	.	-
chr11	66360262	66360676	.	.	+
chr11	66384064	66384596	.	.	+
chr11	66405701	66406406	.	.	+
chr11	6640611	6640997	.	.	-
chr11	66445040	66445346	.	.	-
chr11	66725824	66725884	.	.	-
chr1	16678920	16678976	.	.	-
chr1	166845469	166845691	.	.	-
chr1	16693572	16693783	.	.	+
chr11	67007442	67007802	.	.	+
chr11	67022668	67023061	.	.	+
chr11	6704415	6704627	.	.	-
chr11	67120745	67121079	.	.	-
chr11	67168863	67169351	.	.	-
chr1	167190114	167190179	.	.	+
chr11	67195949	67195996	.	.	+
chr11	67210743	67211279	.	.	-
chr11	67250484	67250616	.	.	+
chr11	67275276	67275922	.	.	-
chr11	67351177	67351649	.	.	+
chr11	67374319	67374432	.	.	+
chr11	67563146	67563148	.	.	-
chr11	67626447	67626457	.	.	-
chr1	16767123	16767247	.	.	+
chr11	67798065	67798372	.	.	+
chr1	167905096	167905393	.	.	-
chr11	68039379	68039424	.	.	-
chr1	168101679	168102085	.	.	+
chr1	168148075	168148592	.	.	+
chr11	68180714	68181225	.	.	+
chr1	168195190	168195403	.	.	+
chr11	68228175	68228282	.	.	+
chr11	68609299	68609310	.	.	-
chr11	68671277	68671311	.	.	-
chr11	68671350	68671420	.	.	+
chr1	168698439	168698445	.	.	-
chr1	169075557	169076054	.	.	+
chr1	169336560	169337050	.	.	-
chr1	169337179	169337517	.	.	+
chr1	169396601	169396712	.	.	-
chr1	169455314	169455433	.	.	+
chr11	69455873	69456227	.	.	+
chr11	69490069	69490143	.	.	-
chr1	169703077	169703223	.	.	-
chr1	16971153	16971209	.	.	-
chr1	169863033	169863108	.	.	-
chr1	170043657	170044137	.	.	-
chr11	70244209	70244692	.	.	+
chr1	170501233	170501342	.	.	+
chr11	71159387	71159468	.	.	-
chr11	71159622	71159859	.	.	+
chr11	71164229	71164298	.	.	+
chr1	171454461	171454834	.	.	+
chr11	71456595	71456982	.	.	+
chr11	71495598	71495610	.	.	+
chr11	715918	715919	.	.	-
chr11	71640072	71640142	.	.	+
chr11	71710533	71710688	.	.	+
chr1	171711100	171711575	.	.	-
chr1	171711293	171711590	.	.	+
chr11	71751779	71752590	.	.	-
chr11	71791213	71791991	.	.	-
chr11	71814246	71814397	.	.	-
chr11	71823280	71823846	.	.	-
chr1	17199772	17200631	.	.	-
chr1	172076161	172076164	.	.	-
chr11	72145249	72145763	.	.	-
chr1	17215944	17216167	.	.	-
chr1	17222341	17222478	.	.	+
chr1	17231691	17231700	.	.	+
chr1	172413102	172413244	.	.	-
chr11	72433088	72433396	.	.	-
chr1	172502257	172502772	.	.	+
chr1	172576971	172577060	.	.	+
chr1	172862224	172862233	.	.	-
chr11	73309027	73309234	.	.	-
chr11	73358653	73358728	.	.	+
chr1	173446422	173446836	.	.	+
chr11	73471849	73472158	.	.	-
chr11	73498913	73499300	.	.	+
chr11	73587388	73588018	.	.	-
chr11	73587743	73588055	.	.	+
chr1	173684062	173684155	.	.	+
chr11	73693884	73693889	.	.	-
chr1	173760686	173760687	.	.	+
chr1	173793713	173794135	.	.	+
chr1	17380461	17380756	.	.	-
chr1	173835933	173836183	.	.	-
chr1	173836949	173837585	.	.	-
chr11	73881845	73882263	.	.	-
chr11	73882131	73882471	.	.	+
chr1	173991620	173991685	.	.	+
chr11	74109369	74109531	.	.	-
chr1	174128582	174128722	.	.	+
chr11	74268390	74268391	.	.	+
chr11	74303590	74303758	.	.	+
chr1	174397526	174397527	.	.	+
chr11	74457237	74457242	.	.	-
chr11	74659865	74660361	.	.	-
chr11	74660232	74660445	.	.	+
chr11	74699706	74700008	.	.	+
chr11	747413	747507	.	.	+
chr1	174768600	174769248	.	.	+
chr11	74865133	74865134	.	.	-
chr1	174923870	174923872	.	.	-
chr1	174969118	174969457	.	.	+
chr1	174992531	174992571	.	.	-
chr11	75110292	75110594	.	.	+
chr11	75113399	75113484	.	.	+
chr1	175161846	175162224	.	.	-
chr11	75370395	75370754	.	.	+
chr11	75476666	75477157	.	.	-
chr11	76149016	76149019	.	.	-
chr11	76155961	76156168	.	.	+
chr11	76381686	76381793	.	.	-
chr1	176522160	176522848	.	.	+
chr11	77184616	77185148	.	.	-
chr11	77348807	77348863	.	.	-
chr1	17743184	17743186	.	.	+
chr11	77531604	77532061	.	.	-
chr11	77705698	77705915	.	.	-
chr11	77734188	77734358	.	.	-
chr11	777475	777506	.	.	-
chr11	77790704	77791376	.	.	-
chr11	77850645	77850678	.	.	-
chr1	178006906	178007120	.	.	-
chr11	78285828	78285916	.	.	-
chr1	178340508	178340582	.	.	+
chr1	178694328	178694439	.	.	+
chr1	17906677	17907050	.	.	+
chr1	179262867	179263326	.	.	+
chr11	796202	796238	.	.	-
chr1	179807989	179808323	.	.	+
chr1	179818115	179818128	.	.	+
chr1	179846891	179846986	.	.	-
chr1	179851240	179852111	.	.	+
chr1	179864544	179864889	.	.	+
chr1	179869396	179869398	.	.	+
chr1	179874363	179874379	.	.	+
chr1	180471454	180472009	.	.	-
chr1	180601121	180601326	.	.	+
chr11	809214	809872	.	.	-
chr11	809623	810273	.	.	+
chr1	181003069	181003167	.	.	+
chr1	181057833	181057932	.	.	+
chr11	8190530	8190635	.	.	-
chr1	182360424	182360999	.	.	-
chr11	82400566	82400701	.	.	+
chr1	182573519	182573528	.	.	-
chr11	82611460	82611874	.	.	-
chr11	82782585	82782997	.	.	-
chr11	82783115	82783151	.	.	+
chr1	182808450	182808886	.	.	+
chr11	82868163	82868610	.	.	+
chr11	82904672	82904705	.	.	-
chr11	82904753	82905040	.	.	+
chr11	82996765	82997442	.	.	-
chr11	830712	830716	.	.	+
chr1	183153729	183153731	.	.	-
chr1	183155294	183155463	.	.	+
chr11	832514	833018	.	.	+
chr11	83275228	83275658	.	.	-
chr1	183387323	183387537	.	.	-
chr11	83404852	83405163	.	.	+
chr1	183440413	183440626	.	.	+
chr1	183574221	183574542	.	.	+
chr1	183604673	183605057	.	.	-
chr1	183605226	183605450	.	.	+
chr11	842501	842561	.	.	-
chr11	8436440	8436441	.	.	+
chr1	184886496	184886498	.	.	-
chr1	184943513	184943955	.	.	-
chr1	185014541	185014720	.	.	+
chr1	185126298	185126664	.	.	+
chr1	185286210	185286427	.	.	-
chr11	85339361	85339852	.	.	-
chr11	85339558	85339650	.	.	+
chr11	85359010	85359068	.	.	+
chr1	185375170	185375177	.	.	-
chr11	85375720	85376173	.	.	-
chr11	85779824	85780266	.	.	-
chr11	86013262	86013472	.	.	+
chr11	8615746	8615825	.	.	-
chr1	186265365	186265563	.	.	+
chr1	186265970	186265971	.	.	+
chr1	186344225	186344864	.	.	-
chr1	186344515	186345323	.	.	+
chr11	86454486	86454845	.	.	-
chr1	186649434	186649559	.	.	-
chr11	86748872	86749078	.	.	+
chr11	86921994	86922331	.	.	-
chr11	8704021	8704797	.	.	+
chr11	8704169	8704243	.	.	-
chr11	88070864	88070958	.	.	-
chr11	8832127	8832294	.	.	-
chr11	88581491	88581492	.	.	+
chr1	188980872	188980873	.	.	-
chr11	8932650	8932990	.	.	+
chr11	8985936	8986287	.	.	-
chr11	8986025	8986434	.	.	+
chr11	8995203	8995209	.	.	-
chr11	89956154	89956264	.	.	-
chr11	89956290	89956353	.	.	+
chr11	90015730	90015732	.	.	+
chr1	19006714	19006716	.	.	-
chr11	910791	910856	.	.	-
chr11	9112451	9112452	.	.	+
chr1	1914341	1914546	.	.	+
chr1	191657845	191657846	.	.	-
chr1	191931013	191931016	.	.	+
chr1	192529241	192529242	.	.	+
chr1	192544818	192544905	.	.	+
chr1	192685019	192685281	.	.	+
chr1	192778061	192778549	.	.	+
chr1	193028399	193028649	.	.	-
chr1	193028530	193028825	.	.	+
chr1	193091087	193091324	.	.	+
chr11	93276476	93276519	.	.	-
chr1	193358191	193358192	.	.	-
chr11	9336075	9336252	.	.	-
chr11	93394790	93394943	.	.	+
chr11	93474380	93474703	.	.	-
chr11	93474820	93475008	.	.	+
chr11	93517428	93517787	.	.	+
chr11	93862278	93862602	.	.	+
chr11	9406031	9406225	.	.	+
chr11	94227129	94227215	.	.	+
chr11	94501481	94501702	.	.	+
chr11	94706696	94706778	.	.	-
chr11	9481889	9482231	.	.	-
chr11	9482532	9482572	.	.	+
chr1	19536843	19537017	.	.	+
chr11	95523624	95523744	.	.	+
chr11	9559078	9559079	.	.	+
chr11	95656997	95657282	.	.	-
chr1	19578005	19578046	.	.	-
chr1	19578076	19578329	.	.	+
chr11	9587105	9587660	.	.	-
chr11	96074926	96074991	.	.	-
chr11	96075984	96076406	.	.	-
chr11	96123027	96123081	.	.	-
chr1	19638794	19638824	.	.	+
chr11	9685618	9685715	.	.	+
chr1	197170306	197170487	.	.	-
chr11	9780998	9781311	.	.	-
chr1	19811796	19812048	.	.	-
chr11	98891265	98891801	.	.	+
chr1	19923168	19923574	.	.	+
chr1	200008011	200008310	.	.	+
chr1	200542728	200542831	.	.	-
chr1	200864001	200864092	.	.	+
chr1	201083494	201083533	.	.	+
chr1	201123579	201123629	.	.	-
chr1	201140028	201140680	.	.	+
chr1	20126155	20126758	.	.	-
chr1	201368386	201368486	.	.	-
chr1	20141642	20141771	.	.	-
chr1	201475992	201476297	.	.	-
chr1	201708948	201709060	.	.	+
chr1	201798277	201798334	.	.	+
chr1	201924618	201924653	.	.	+
chr1	201979460	201979490	.	.	-
chr1	201979636	201979835	.	.	+
chr1	202311043	202311083	.	.	-
chr1	2023427	2023429	.	.	-
chr1	202858226	202858403	.	.	-
chr1	202896261	202896371	.	.	-
chr1	202936002	202936418	.	.	-
chr1	203155829	203155876	.	.	-
chr1	203274376	203274453	.	.	-
chr1	203274519	203274878	.	.	+
chr1	203320215	203320263	.	.	-
chr1	203444922	203444966	.	.	+
chr1	203595851	203596249	.	.	+
chr1	203759299	203759300	.	.	-
chr1	203764681	203765247	.	.	+
chr1	203830696	203830775	.	.	+
chr1	203831257	203831258	.	.	-
chr1	204042226	204042281	.	.	+
chr1	204182731	204183253	.	.	-
chr1	204257280	204257495	.	.	-
chr1	204283400	204283413	.	.	-
chr1	204320125	204320187	.	.	-
chr1	204380477	204381187	.	.	-
chr1	204485510	204485652	.	.	+
chr1	204797790	204798167	.	.	+
chr1	205091086	205091157	.	.	-
chr1	20512579	20512937	.	.	+
chr1	205197716	205197717	.	.	-
chr1	205235221	205235223	.	.	+
chr1	205248211	205248308	.	.	+
chr1	205290544	205291022	.	.	-
chr1	205361523	205361525	.	.	+
chr1	205589465	205589942	.	.	-
chr1	205601198	205601261	.	.	+
chr1	205684255	205684822	.	.	-
chr1	205719148	205719330	.	.	-
chr1	205744220	205744628	.	.	-
chr1	205782156	205782288	.	.	-
chr1	205819241	205819300	.	.	-
chr1	206317461	206317592	.	.	+
chr1	20664053	20664141	.	.	-
chr1	206730443	206730930	.	.	+
chr1	206785372	206785829	.	.	-
chr1	206858695	206859185	.	.	+
chr1	206939903	206940351	.	.	+
chr1	207080942	207080952	.	.	+
chr1	207119682	207119812	.	.	-
chr1	207205997	207206176	.	.	-
chr1	207224104	207224753	.	.	-
chr1	207226319	207226463	.	.	-
chr1	207226379	207226740	.	.	+
chr1	207925373	207925736	.	.	+
chr1	207995617	207996048	.	.	-
chr1	208039454	208039947	.	.	-
chr1	20812499	20812763	.	.	-
chr1	20834535	20834661	.	.	-
chr1	208417536	208417667	.	.	-
chr1	208526151	208526153	.	.	-
chr1	209825767	209825846	.	.	-
chr1	209848579	209848996	.	.	+
chr1	20987461	20988023	.	.	-
chr1	209957889	209957920	.	.	-
chr1	209979325	209979804	.	.	-
chr12	100594562	100594629	.	.	+
chr12	100660914	100661406	.	.	+
chr12	100967224	100967513	.	.	+
chr1	210111498	210111607	.	.	+
chr12	101673875	101673908	.	.	+
chr12	101801088	101801586	.	.	-
chr12	101926132	101926133	.	.	-
chr12	102455745	102455877	.	.	-
chr12	102513824	102513898	.	.	-
chr12	10365439	10365744	.	.	+
chr12	104324097	104324549	.	.	+
chr12	104359592	104360087	.	.	+
chr12	104424505	104424532	.	.	+
chr12	104458299	104458338	.	.	+
chr12	104659045	104659128	.	.	+
chr12	104680657	104681212	.	.	+
chr12	104682642	104682764	.	.	+
chr12	105351999	105352072	.	.	-
chr12	105380074	105380118	.	.	+
chr12	105501489	105501564	.	.	+
chr12	105629826	105629909	.	.	-
chr12	105724458	105724679	.	.	+
chr12	10658488	10658491	.	.	+
chr12	106696284	106696872	.	.	+
chr12	106696881	106697405	.	.	-
chr12	106751483	106751621	.	.	+
chr12	107168153	107168503	.	.	+
chr12	107380835	107380951	.	.	-
chr12	107487018	107487353	.	.	-
chr12	10766149	10766201	.	.	-
chr12	108051004	108051006	.	.	+
chr12	108079520	108079734	.	.	+
chr12	10830024	10830025	.	.	+
chr12	108525467	108525566	.	.	+
chr12	108908962	108909148	.	.	+
chr12	108954674	108954951	.	.	-
chr12	109125270	109125316	.	.	-
chr12	109531209	109531436	.	.	-
chr12	109531224	109531709	.	.	+
chr12	109535949	109536209	.	.	+
chr12	109554379	109554451	.	.	+
chr12	109568778	109569621	.	.	+
chr12	109914903	109915165	.	.	-
chr12	109915070	109915453	.	.	+
chr12	1099949	1100288	.	.	-
chr12	110011170	110011567	.	.	-
chr12	110035011	110035257	.	.	-
chr12	1100416	1100485	.	.	+
chr12	110317882	110318241	.	.	-
chr12	110338025	110338139	.	.	+
chr12	110433705	110434182	.	.	-
chr12	110471165	110471166	.	.	-
chr12	110486300	110486371	.	.	-
chr12	110562114	110562344	.	.	+
chr12	110841467	110841545	.	.	-
chr12	110888077	110888177	.	.	-
chr12	110939522	110939936	.	.	-
chr12	111048365	111048600	.	.	-
chr12	111051863	111051998	.	.	+
chr1	21113096	21113279	.	.	-
chr12	112037414	112037475	.	.	+
chr12	112123840	112123907	.	.	+
chr12	112279719	112279757	.	.	-
chr12	112450898	112450971	.	.	-
chr12	112451130	112451273	.	.	+
chr12	112522447	112522463	.	.	+
chr12	112533094	112533095	.	.	+
chr12	112546556	112546602	.	.	-
chr12	112563307	112563366	.	.	+
chr12	112704879	112704882	.	.	+
chr12	112846324	112846462	.	.	-
chr12	112847041	112847461	.	.	-
chr12	11324134	11324232	.	.	-
chr12	113623197	113623284	.	.	-
chr12	113772902	113772941	.	.	-
chr12	113827130	113828245	.	.	+
chr12	113860059	113860219	.	.	+
chr12	114282891	114282892	.	.	-
chr1	211432680	211432790	.	.	+
chr12	114404121	114404181	.	.	-
chr12	115121541	115122325	.	.	-
chr1	211555643	211556482	.	.	+
chr12	117628159	117628305	.	.	-
chr12	118406671	118406910	.	.	-
chr12	118454498	118454570	.	.	+
chr12	118573857	118574126	.	.	+
chr12	119170804	119170806	.	.	+
chr12	119616623	119616849	.	.	+
chr1	211975580	211975741	.	.	-
chr12	120105639	120106053	.	.	+
chr12	120632487	120632546	.	.	-
chr12	120636923	120637284	.	.	-
chr12	120638559	120638923	.	.	-
chr12	120663771	120663872	.	.	-
chr12	120703494	120703540	.	.	-
chr12	120729630	120729712	.	.	-
chr12	120730963	120731042	.	.	-
chr12	120763669	120763886	.	.	-
chr12	120765495	120765709	.	.	-
chr12	120875699	120875937	.	.	+
chr12	120884180	120884460	.	.	-
chr12	120884227	120884518	.	.	+
chr12	120907619	120907692	.	.	+
chr12	120933649	120933742	.	.	-
chr12	120933849	120934328	.	.	+
chr12	120966935	120966995	.	.	-
chr12	120971685	120972159	.	.	+
chr12	121019180	121019205	.	.	-
chr12	121163608	121163663	.	.	+
chr12	121454237	121454298	.	.	-
chr12	121647902	121648023	.	.	+
chr12	121790172	121790263	.	.	-
chr12	121837885	121838122	.	.	+
chr1	212208859	212208900	.	.	-
chr12	122240846	122240852	.	.	-
chr12	122326617	122326762	.	.	+
chr12	122710316	122710612	.	.	-
chr12	122750631	122751041	.	.	-
chr12	122849287	122849291	.	.	+
chr12	122906623	122907577	.	.	-
chr12	122985120	122985565	.	.	-
chr12	123011477	123011664	.	.	-
chr12	123125296	123125297	.	.	-
chr12	123164339	123164346	.	.	-
chr12	123237232	123237438	.	.	+
chr12	123267661	123267938	.	.	-
chr12	123320000	123320175	.	.	+
chr12	123380451	123380671	.	.	-
chr12	123450579	123451050	.	.	-
chr12	123459755	123459926	.	.	+
chr12	123717364	123717691	.	.	-
chr12	123717939	123718071	.	.	+
chr12	123803133	123803134	.	.	+
chr12	123849316	123849408	.	.	-
chr12	123887148	123887149	.	.	-
chr12	123922038	123922215	.	.	-
chr12	123942650	123942742	.	.	+
chr12	124069062	124069468	.	.	+
chr12	124086220	124086731	.	.	+
chr12	124118316	124118395	.	.	+
chr12	124155659	124155733	.	.	+
chr12	124457761	124457877	.	.	+
chr1	212482870	212482872	.	.	-
chr12	124873359	124873911	.	.	-
chr12	12503147	12503209	.	.	-
chr12	125037732	125038112	.	.	-
chr12	12509866	12510053	.	.	+
chr12	125131223	125131224	.	.	+
chr12	125252533	125252546	.	.	+
chr12	125309624	125310094	.	.	+
chr12	125397711	125398294	.	.	-
chr12	125398804	125399495	.	.	-
chr12	125505294	125505303	.	.	+
chr12	125506479	125506519	.	.	+
chr12	125517175	125517199	.	.	+
chr12	125523027	125523030	.	.	+
chr12	125544698	125544706	.	.	+
chr12	125567219	125567495	.	.	+
chr12	125648284	125648301	.	.	+
chr12	125652906	125653044	.	.	+
chr12	125663768	125663789	.	.	+
chr12	125766292	125766428	.	.	+
chr12	125782667	125783078	.	.	+
chr12	125786277	125786776	.	.	+
chr1	212588162	212588233	.	.	-
chr12	12713956	12714119	.	.	-
chr12	127544988	127545321	.	.	+
chr12	12764778	12765097	.	.	+
chr12	128640314	128640315	.	.	+
chr12	12870296	12870429	.	.	+
chr12	129285288	129285571	.	.	+
chr1	212965098	212965297	.	.	-
chr1	212965202	212965317	.	.	+
chr12	12966268	12966327	.	.	+
chr12	130015603	130015729	.	.	-
chr12	13028409	13028411	.	.	+
chr12	13044478	13044501	.	.	+
chr12	131118371	131118903	.	.	-
chr12	131200790	131200855	.	.	-
chr12	131356554	131357079	.	.	+
chr12	13153360	13153410	.	.	+
chr1	213188797	213189226	.	.	-
chr12	13197287	13197334	.	.	+
chr12	132270708	132270709	.	.	+
chr12	132379092	132379094	.	.	-
chr12	132434475	132434966	.	.	+
chr12	132484437	132484438	.	.	-
chr12	133204780	133204794	.	.	+
chr12	133288225	133288226	.	.	+
chr12	133322788	133323191	.	.	+
chr12	133404939	133405705	.	.	-
chr12	13349655	13349723	.	.	+
chr12	133707164	133707275	.	.	+
chr12	133758080	133758173	.	.	+
chr12	133796854	133797211	.	.	+
chr12	13878512	13878513	.	.	+
chr1	214161258	214161780	.	.	+
chr1	214170847	214170990	.	.	+
chr12	14217725	14217727	.	.	+
chr12	14518313	14518958	.	.	+
chr1	214724601	214725025	.	.	-
chr1	214844655	214844659	.	.	+
chr12	14923640	14924124	.	.	-
chr12	14926909	14927670	.	.	+
chr12	14955879	14956499	.	.	-
chr1	21503372	21503402	.	.	-
chr12	15038772	15038955	.	.	-
chr12	15091417	15091502	.	.	-
chr1	215173007	215173497	.	.	+
chr12	15942252	15942356	.	.	-
chr12	16035285	16035737	.	.	+
chr12	16064244	16064297	.	.	+
chr1	21616699	21616961	.	.	-
chr1	216366604	216366605	.	.	+
chr12	16500521	16500681	.	.	+
chr1	21671886	21671997	.	.	-
chr1	216896747	216896814	.	.	-
chr1	217804361	217804445	.	.	-
chr1	218386498	218386501	.	.	-
chr12	19282628	19282723	.	.	+
chr1	219347170	219347513	.	.	+
chr1	21995804	21996287	.	.	-
chr1	220219605	220219925	.	.	-
chr1	220263098	220263546	.	.	-
chr1	220445595	220446054	.	.	-
chr12	20522596	20523093	.	.	+
chr12	2113587	2113742	.	.	-
chr1	221319844	221319847	.	.	+
chr1	221319858	221319866	.	.	-
chr12	21525683	21526290	.	.	+
chr12	21531174	21531619	.	.	+
chr12	21590551	21590881	.	.	+
chr12	2163442	2163802	.	.	+
chr12	21654203	21654591	.	.	-
chr12	21654714	21655124	.	.	+
chr12	21810711	21810905	.	.	-
chr1	221915187	221915879	.	.	-
chr12	22094129	22094581	.	.	-
chr1	22234548	22234550	.	.	+
chr12	22696798	22697229	.	.	+
chr12	22697093	22697504	.	.	-
chr12	22778083	22778246	.	.	+
chr1	222791415	222791558	.	.	+
chr1	222817447	222817578	.	.	-
chr1	222817613	222817732	.	.	+
chr1	222885688	222885845	.	.	-
chr1	222885884	222886206	.	.	+
chr1	222886645	222886744	.	.	+
chr1	222988346	222988478	.	.	+
chr1	22303354	22303573	.	.	+
chr1	22304860	22304943	.	.	+
chr1	22307313	22307662	.	.	+
chr1	22310186	22310909	.	.	+
chr1	22327929	22328206	.	.	+
chr1	22329494	22329577	.	.	+
chr1	22331936	22332248	.	.	+
chr1	22333370	22333991	.	.	+
chr1	22351976	22352046	.	.	+
chr1	223537401	223537692	.	.	-
chr1	22365691	22365704	.	.	-
chr1	22379108	22379245	.	.	+
chr1	223810458	223810460	.	.	+
chr1	223900240	223900409	.	.	+
chr12	24020331	24020332	.	.	+
chr12	24102520	24102704	.	.	-
chr1	224180250	224180682	.	.	-
chr1	224180417	224180877	.	.	+
chr1	224301806	224301821	.	.	+
chr1	224370567	224370983	.	.	+
chr1	224517838	224518153	.	.	-
chr1	224544540	224544667	.	.	+
chr12	24664744	24664748	.	.	+
chr12	25101943	25102357	.	.	-
chr12	25347758	25348244	.	.	+
chr1	225615667	225615791	.	.	-
chr12	25801489	25801618	.	.	-
chr1	225965506	225965618	.	.	+
chr1	225997749	225998110	.	.	+
chr1	226070020	226070108	.	.	-
chr1	226080748	226081228	.	.	-
chr1	226111830	226112040	.	.	-
chr1	226126734	226126735	.	.	-
chr1	226137540	226137542	.	.	-
chr1	226187015	226187092	.	.	-
chr1	226187313	226187331	.	.	+
chr1	226250384	226250809	.	.	+
chr1	226275256	226275699	.	.	-
chr12	26277792	26278036	.	.	-
chr12	26278606	26279551	.	.	-
chr1	226595650	226595766	.	.	-
chr12	26611338	26611339	.	.	+
chr1	227058178	227058690	.	.	+
chr12	27090885	27090943	.	.	-
chr12	27090974	27091763	.	.	+
chr1	227127991	227128366	.	.	+
chr12	27175454	27175518	.	.	+
chr12	27397213	27397252	.	.	+
chr1	227506018	227506213	.	.	-
chr12	27676742	27677231	.	.	+
chr1	227751221	227751559	.	.	+
chr1	22778323	22778354	.	.	+
chr12	27863477	27863797	.	.	+
chr1	227923128	227923324	.	.	+
chr1	228270328	228270477	.	.	+
chr1	228284603	228284835	.	.	-
chr1	228284819	228285389	.	.	+
chr1	228285658	228286288	.	.	+
chr1	228296954	228297024	.	.	-
chr1	228327750	228328360	.	.	+
chr12	28343349	28343880	.	.	+
chr1	228645781	228645840	.	.	+
chr1	22901042	22901221	.	.	-
chr12	2921765	2921866	.	.	+
chr1	229407004	229407069	.	.	+
chr12	29534077	29534163	.	.	-
chr1	22963107	22963175	.	.	+
chr1	229643794	229644107	.	.	-
chr1	22970121	22970161	.	.	+
chr1	22979712	22979768	.	.	+
chr12	2986364	2986638	.	.	+
chr12	3000024	3000104	.	.	+
chr1	230778202	230778311	.	.	+
chr12	30848652	30848938	.	.	-
chr1	230849470	230850041	.	.	-
chr12	3106532	3106533	.	.	-
chr1	231114817	231115020	.	.	+
chr12	31226771	31227151	.	.	+
chr1	231376877	231376959	.	.	-
chr1	231376941	231377098	.	.	+
chr12	31405552	31405556	.	.	-
chr1	231473560	231473694	.	.	-
chr1	231473711	231474240	.	.	+
chr12	31476801	31477096	.	.	-
chr12	31478843	31479236	.	.	-
chr1	231604261	231604353	.	.	-
chr1	231664333	231664638	.	.	+
chr12	31862635	31862636	.	.	+
chr12	3186537	3186595	.	.	+
chr12	31881755	31882032	.	.	-
chr12	31945231	31945232	.	.	-
chr12	32112297	32112739	.	.	+
chr12	32552313	32553186	.	.	+
chr12	32654971	32655152	.	.	+
chr12	32687161	32687289	.	.	+
chr12	32832152	32832260	.	.	+
chr12	32908443	32908840	.	.	-
chr12	33049679	33049741	.	.	-
chr1	233086318	233086780	.	.	+
chr1	233140442	233140532	.	.	+
chr12	3321115	3321118	.	.	-
chr1	233425236	233425238	.	.	-
chr1	23345814	23346112	.	.	-
chr1	233749851	233750245	.	.	+
chr12	34175392	34175460	.	.	+
chr1	234492904	234493290	.	.	-
chr1	234509068	234509414	.	.	-
chr1	234509178	234509422	.	.	+
chr1	234538829	234538830	.	.	-
chr1	234743016	234744346	.	.	-
chr1	234746426	234746638	.	.	-
chr1	23495304	23495352	.	.	-
chr1	235179229	235179410	.	.	+
chr1	235291997	235292253	.	.	-
chr1	235324417	235324597	.	.	-
chr1	235491139	235491536	.	.	-
chr1	235491848	235492316	.	.	+
chr1	235530734	235531040	.	.	+
chr1	235812976	235813051	.	.	-
chr1	235813875	235814450	.	.	-
chr1	236030159	236030238	.	.	-
chr1	236228382	236228493	.	.	-
chr12	3642382	3642383	.	.	-
chr1	236444824	236445263	.	.	-
chr1	236451671	236451674	.	.	+
chr1	236558613	236558811	.	.	+
chr1	236687068	236687395	.	.	+
chr1	23670742	23671253	.	.	-
chr1	236767787	236767844	.	.	-
chr1	23694716	23694851	.	.	-
chr1	236958550	236958990	.	.	+
chr1	23751138	23751241	.	.	-
chr1	237802451	237802453	.	.	-
chr12	38710550	38710602	.	.	+
chr1	23885876	23886141	.	.	-
chr12	39299281	39299736	.	.	-
chr12	39300090	39300677	.	.	-
chr12	3982255	3982554	.	.	-
chr1	24018133	24018315	.	.	+
chr1	24019086	24019230	.	.	+
chr1	240286426	240286512	.	.	+
chr12	40673934	40673935	.	.	-
chr1	24069923	24069990	.	.	+
chr12	40792233	40792303	.	.	+
chr1	241011378	241011379	.	.	+
chr12	41086220	41086328	.	.	+
chr1	24117510	24117712	.	.	+
chr1	24127031	24127271	.	.	-
chr1	24151902	24151985	.	.	-
chr1	241683010	241683085	.	.	-
chr12	41867335	41867391	.	.	-
chr1	24194731	24194800	.	.	-
chr12	42395435	42395438	.	.	+
chr12	42719827	42720005	.	.	+
chr12	42719858	42719941	.	.	-
chr1	24306794	24306914	.	.	-
chr1	243418367	243418781	.	.	-
chr1	243419335	243419406	.	.	+
chr12	4382909	4383325	.	.	+
chr12	44152389	44152588	.	.	-
chr12	44152664	44152869	.	.	+
chr12	44199909	44200134	.	.	-
chr12	4430364	4430419	.	.	+
chr1	244615177	244615233	.	.	-
chr1	24469560	24469729	.	.	-
chr1	244736566	244736567	.	.	+
chr1	244925758	244925761	.	.	+
chr1	244998615	244999120	.	.	+
chr1	245027712	245027869	.	.	-
chr1	245107056	245107213	.	.	+
chr1	245133706	245134205	.	.	+
chr1	2458015	2458051	.	.	-
chr12	46121224	46121596	.	.	-
chr12	46384223	46384509	.	.	-
chr1	246599863	246599867	.	.	-
chr12	46662463	46663019	.	.	-
chr1	246729170	246729621	.	.	-
chr1	246729639	246729889	.	.	+
chr12	46766303	46766618	.	.	-
chr12	46777215	46777854	.	.	+
chr1	246887679	246887716	.	.	+
chr12	4714001	4714283	.	.	+
chr12	47219730	47219921	.	.	-
chr1	247267522	247267718	.	.	-
chr1	247273676	247274113	.	.	+
chr1	247374046	247374209	.	.	-
chr1	24740182	24740272	.	.	-
chr1	24742269	24742720	.	.	+
chr12	4758250	4758471	.	.	+
chr1	247595075	247595076	.	.	+
chr1	247735453	247735456	.	.	+
chr12	48099457	48099821	.	.	-
chr1	24828833	24829042	.	.	+
chr12	48298415	48299165	.	.	-
chr12	48357362	48357435	.	.	+
chr12	48499634	48499862	.	.	-
chr12	48513082	48513152	.	.	+
chr12	48551219	48551378	.	.	-
chr12	48591703	48592174	.	.	+
chr12	48591918	48591956	.	.	-
chr1	2487212	2487280	.	.	+
chr1	24882592	24882750	.	.	+
chr12	49075992	49076048	.	.	-
chr12	49110451	49110628	.	.	-
chr1	249120082	249120140	.	.	-
chr12	49245870	49246402	.	.	-
chr12	49259644	49259654	.	.	-
chr12	49319156	49319577	.	.	-
chr12	49350951	49351310	.	.	-
chr12	49412525	49412837	.	.	-
chr12	49445839	49446157	.	.	-
chr12	49454346	49454882	.	.	-
[truncated: 8,323 more rows]

## Sheet: tcs_5sample
chrom	start	end	name	score	strand
chr10	100027461	100027953	.	.	-
chr10	100206349	100206712	.	.	-
chr10	101190379	101190436	.	.	-
chr10	101190686	101190755	.	.	+
chr10	101380828	101381161	.	.	+
chr10	101419100	101419545	.	.	+
chr10	101491756	101491937	.	.	-
chr10	101491961	101492066	.	.	+
chr10	101497623	101497624	.	.	+
chr10	101690595	101690696	.	.	-
chr10	10175259	10175393	.	.	+
chr10	101769638	101769698	.	.	-
chr10	101945347	101945808	.	.	-
chr10	102027378	102027454	.	.	-
chr10	102046113	102046472	.	.	-
chr10	102106834	102107348	.	.	+
chr10	102133249	102133622	.	.	+
chr10	102254561	102254915	.	.	-
chr10	102289586	102289680	.	.	-
chr10	102295683	102295709	.	.	+
chr10	102672719	102672753	.	.	+
chr10	102746980	102747285	.	.	-
chr10	102790878	102790916	.	.	-
chr10	102791843	102792214	.	.	+
chr10	102828423	102828426	.	.	+
chr10	103113759	103114198	.	.	+
chr10	103124779	103124792	.	.	-
chr10	103347822	103348043	.	.	-
chr10	103348036	103348089	.	.	+
chr10	1034361	1034418	.	.	+
chr10	103543151	103543172	.	.	-
chr10	103578159	103578206	.	.	-
chr10	103815741	103815928	.	.	-
chr10	103870647	103871018	.	.	-
chr10	103911931	103912482	.	.	+
chr10	104005258	104005471	.	.	+
chr10	104012475	104012476	.	.	+
chr10	104048320	104048322	.	.	+
chr10	104094459	104094576	.	.	+
chr10	104095911	104095912	.	.	+
chr10	104153993	104154423	.	.	+
chr10	104154044	104154378	.	.	-
chr10	104155015	104155366	.	.	-
chr10	104180595	104181212	.	.	+
chr10	104192181	104192409	.	.	-
chr10	104199788	104199790	.	.	+
chr10	104211234	104211300	.	.	-
chr10	104221140	104221157	.	.	+
chr10	104262092	104262494	.	.	-
chr10	104402095	104402096	.	.	+
chr10	104405674	104406149	.	.	-
chr10	104473960	104474200	.	.	-
chr10	104503702	104504194	.	.	+
chr10	104613979	104614046	.	.	+
chr10	104656994	104656995	.	.	+
chr10	104678039	104678089	.	.	+
chr10	104941085	104941086	.	.	-
chr10	104953008	104953072	.	.	-
chr10	105036894	105036895	.	.	+
chr10	105091712	105091713	.	.	-
chr10	105129278	105129279	.	.	-
chr10	105156184	105156282	.	.	-
chr10	105156361	105156434	.	.	+
chr10	105315041	105315109	.	.	+
chr10	105601736	105601737	.	.	+
chr10	105677820	105678049	.	.	-
chr10	105726737	105726834	.	.	-
chr10	105880873	105880932	.	.	+
chr10	105881277	105881627	.	.	-
chr10	105881928	105881929	.	.	+
chr10	106014467	106014871	.	.	+
chr10	106015514	106015639	.	.	-
chr10	106028655	106028788	.	.	-
chr10	106034630	106034932	.	.	+
chr10	106241160	106241161	.	.	+
chr10	106898044	106898047	.	.	-
chr10	107841552	107841553	.	.	+
chr10	1094822	1095307	.	.	-
chr10	1095025	1095035	.	.	+
chr10	1102715	1102775	.	.	+
chr10	11060001	11060028	.	.	+
chr10	111260429	111260434	.	.	+
chr10	111674720	111674969	.	.	-
chr10	111682939	111683295	.	.	-
chr10	111767702	111768003	.	.	+
chr10	111987067	111987404	.	.	+
chr10	112064669	112064721	.	.	-
chr10	11207003	11207383	.	.	+
chr10	112219880	112220335	.	.	-
chr10	112327417	112327498	.	.	+
chr10	112631542	112631758	.	.	+
chr10	112678693	112679128	.	.	-
chr10	112679326	112679385	.	.	+
chr10	112903792	112903793	.	.	+
chr10	113153732	113153733	.	.	+
chr10	113943488	113943536	.	.	-
chr10	114206505	114206728	.	.	-
chr10	114206743	114207078	.	.	+
chr10	114709963	114710508	.	.	+
chr10	114710536	114711005	.	.	+
chr10	11537994	11537999	.	.	+
chr10	115412257	115412258	.	.	+
chr10	115438943	115439043	.	.	+
chr10	115439492	115440026	.	.	+
chr10	115556077	115556091	.	.	+
chr10	115567191	115567192	.	.	-
chr10	115613723	115614380	.	.	-
chr10	115933537	115934087	.	.	-
chr10	116164222	116164271	.	.	-
chr10	116286544	116286688	.	.	-
chr10	116391581	116391870	.	.	-
chr10	116444179	116444377	.	.	-
chr10	116697951	116698216	.	.	+
chr10	118305291	118305645	.	.	+
chr10	118306801	118306957	.	.	+
chr10	118307835	118307992	.	.	+
chr10	118310607	118310742	.	.	+
chr10	118312985	118313347	.	.	+
chr10	118314360	118315001	.	.	+
chr10	118315485	118315644	.	.	+
chr10	118318671	118318753	.	.	+
chr10	118349670	118349934	.	.	+
chr10	118349985	118350677	.	.	+
chr10	118357385	118357603	.	.	+
chr10	118368997	118369539	.	.	-
chr10	118373967	118373973	.	.	+
chr10	118380137	118380984	.	.	+
chr10	118609155	118609662	.	.	-
chr10	11865351	11865403	.	.	+
chr10	118764575	118764871	.	.	-
chr10	118999707	118999716	.	.	+
chr10	120101800	120101850	.	.	-
chr10	120275689	120275833	.	.	+
chr10	120514799	120514863	.	.	+
chr10	120788796	120788852	.	.	-
chr10	120839588	120839741	.	.	+
chr10	120839830	120840688	.	.	-
chr10	120863615	120863629	.	.	+
chr10	120924886	120925226	.	.	-
chr10	120938263	120938341	.	.	-
chr10	121042163	121042164	.	.	+
chr10	12110909	12111006	.	.	+
chr10	121157392	121157403	.	.	-
chr10	121356473	121356551	.	.	-
chr10	12137865	12137866	.	.	+
chr10	121410893	121410904	.	.	+
chr10	121486283	121486285	.	.	-
chr10	121519810	121519933	.	.	+
chr10	121578171	121578690	.	.	+
chr10	121652109	121652426	.	.	+
chr10	12171654	12171727	.	.	+
chr10	12237838	12238142	.	.	-
chr10	12237934	12238259	.	.	+
chr10	122483461	122483464	.	.	-
chr10	122610801	122610945	.	.	+
chr10	123372405	123372406	.	.	-
chr10	123687954	123687983	.	.	-
chr10	123872504	123872688	.	.	+
chr10	123914639	123914735	.	.	-
chr10	124134273	124134994	.	.	+
chr10	124596387	124597068	.	.	-
chr10	124598571	124599026	.	.	-
chr10	124605281	124605651	.	.	-
chr10	124713729	124713736	.	.	-
chr10	124768272	124768400	.	.	-
chr10	124768463	124768561	.	.	+
chr10	124913872	124914328	.	.	+
chr10	126107007	126107939	.	.	-
chr10	126480406	126480456	.	.	-
chr10	126490373	126490389	.	.	+
chr10	126846984	126847464	.	.	-
chr10	126848917	126848956	.	.	-
chr10	127408050	127408575	.	.	-
chr10	127408147	127408643	.	.	+
chr10	127480423	127480604	.	.	+
chr10	127512109	127512180	.	.	+
chr10	127523268	127523572	.	.	+
chr10	127585104	127585178	.	.	+
chr10	127586603	127586608	.	.	+
chr10	127727691	127727692	.	.	-
chr10	128593993	128594025	.	.	+
chr10	128811252	128811269	.	.	+
chr10	12943878	12943882	.	.	+
chr10	129785543	129785549	.	.	+
chr10	130434330	130434334	.	.	+
chr10	131265446	131265513	.	.	+
chr10	13141924	13142300	.	.	+
chr10	131677536	131677686	.	.	-
chr10	131776418	131776421	.	.	-
chr10	131934640	131934765	.	.	+
chr10	13341628	13342113	.	.	-
chr10	13344348	13344409	.	.	-
chr10	133468198	133468199	.	.	-
chr10	133795276	133795467	.	.	-
chr10	134228648	134228774	.	.	+
chr10	134756044	134756088	.	.	-
chr10	134973935	134973970	.	.	+
chr10	135122340	135122420	.	.	-
chr10	135150372	135150485	.	.	-
chr10	135171515	135171538	.	.	-
chr10	135186839	135186880	.	.	-
chr10	135207660	135208195	.	.	+
chr10	13628951	13629008	.	.	+
chr10	14032724	14032725	.	.	+
chr10	14341131	14341132	.	.	+
chr10	14598123	14598191	.	.	-
chr10	14879999	14880482	.	.	-
chr10	14880162	14880382	.	.	+
chr10	14920409	14920685	.	.	-
chr10	14920864	14920865	.	.	+
chr10	14996042	14996830	.	.	-
chr10	15067907	15067908	.	.	+
chr10	15139375	15140047	.	.	+
chr10	15239143	15239144	.	.	-
chr10	15413054	15413077	.	.	-
chr10	15902454	15902521	.	.	-
chr10	16345155	16345156	.	.	+
chr10	16478919	16479363	.	.	+
chr10	16859368	16859487	.	.	-
chr10	16933889	16933892	.	.	+
chr10	17243643	17243671	.	.	-
chr10	17271272	17271596	.	.	+
chr10	17686127	17686292	.	.	+
chr10	181446	181480	.	.	+
chr10	18180713	18180745	.	.	+
chr10	18429608	18430043	.	.	+
chr10	18579840	18580130	.	.	+
chr10	18940483	18940562	.	.	-
chr10	18948031	18948186	.	.	-
chr10	20105334	20105573	.	.	+
chr10	21352142	21352144	.	.	-
chr10	21865334	21865335	.	.	-
chr10	2238196	2238197	.	.	+
chr10	22605287	22605634	.	.	+
chr10	22634398	22634650	.	.	+
chr10	23002047	23002049	.	.	-
chr10	23062356	23062357	.	.	+
chr10	23391897	23391898	.	.	+
chr10	24497693	24498092	.	.	+
chr10	24755060	24755772	.	.	+
chr10	25013422	25013587	.	.	-
chr10	25054987	25055475	.	.	+
chr10	25305522	25306026	.	.	+
chr10	26036272	26036330	.	.	+
chr10	26222855	26223420	.	.	+
chr10	26223908	26224017	.	.	+
chr10	26504786	26505725	.	.	+
chr10	26507001	26507361	.	.	+
chr10	26547338	26547339	.	.	-
chr10	26675988	26675989	.	.	-
chr10	26792417	26792418	.	.	+
chr10	27149786	27150011	.	.	-
chr10	27443124	27443349	.	.	-
chr10	27444030	27444209	.	.	-
chr10	27444280	27444323	.	.	+
chr10	27529343	27529767	.	.	-
chr10	27793111	27793286	.	.	+
chr10	28821661	28821791	.	.	+
chr10	28878691	28878712	.	.	+
chr10	28966449	28966455	.	.	+
chr10	29081264	29081265	.	.	-
chr10	29698428	29698597	.	.	+
chr10	29814416	29814417	.	.	+
chr10	29883625	29883628	.	.	-
chr10	30024724	30024792	.	.	-
chr10	30956684	30956685	.	.	-
chr10	3109278	3109766	.	.	+
chr10	31607348	31607524	.	.	+
chr10	31607776	31608159	.	.	+
chr10	31607892	31607986	.	.	-
chr10	32048810	32049057	.	.	-
chr10	3214916	3215121	.	.	-
chr10	32217648	32217759	.	.	-
chr10	32281294	32281295	.	.	-
chr10	32301988	32301993	.	.	-
chr10	32345012	32345379	.	.	-
chr10	32381503	32381875	.	.	-
chr10	32428910	32428911	.	.	-
chr10	32447936	32448007	.	.	-
chr10	32472948	32472952	.	.	-
chr10	32494204	32494215	.	.	-
chr10	32513088	32513112	.	.	-
chr10	32547079	32547081	.	.	-
chr10	32635983	32636146	.	.	-
chr10	32667613	32667726	.	.	-
chr10	3313350	3313352	.	.	-
chr10	33192067	33192471	.	.	-
chr10	33208846	33209265	.	.	-
chr10	33231079	33231320	.	.	-
chr10	33247096	33247158	.	.	-
chr10	33269608	33269824	.	.	+
chr10	33271453	33271509	.	.	+
chr10	33294285	33294791	.	.	-
chr10	33594859	33594860	.	.	-
chr10	33623299	33623851	.	.	-
chr10	33683780	33683781	.	.	+
chr10	3373049	3373050	.	.	+
chr10	34817276	34817282	.	.	-
chr10	34886649	34886652	.	.	+
chr10	35379246	35379542	.	.	-
chr10	35415741	35416101	.	.	+
chr10	35484058	35484463	.	.	+
chr10	35596001	35596410	.	.	-
chr10	35659806	35659807	.	.	-
chr10	3646054	3646055	.	.	-
chr10	375396	375701	.	.	-
chr10	37586520	37586521	.	.	+
chr10	38146188	38146988	.	.	-
chr10	3824379	3825200	.	.	-
chr10	38265163	38265575	.	.	-
chr10	3827118	3827478	.	.	-
chr10	38299546	38299663	.	.	+
chr10	38383262	38383832	.	.	+
chr10	3848982	3849114	.	.	+
chr10	38645304	38645344	.	.	+
chr10	38691316	38691743	.	.	-
chr10	38692145	38692149	.	.	+
chr10	38692151	38692153	.	.	+
chr10	3912023	3912024	.	.	+
chr10	42971039	42971445	.	.	+
chr10	43048194	43048280	.	.	-
chr10	43133541	43134064	.	.	-
chr10	43274346	43274348	.	.	+
chr10	43277925	43278303	.	.	+
chr10	43535726	43535727	.	.	+
chr10	43633946	43633998	.	.	+
chr10	43892191	43892932	.	.	-
chr10	43900822	43900823	.	.	+
chr10	43903219	43903263	.	.	-
chr10	43904277	43904696	.	.	-
chr10	43932285	43932654	.	.	+
chr10	43975255	43975256	.	.	-
chr10	44032623	44032870	.	.	+
chr10	44101383	44101384	.	.	+
chr10	44101867	44101912	.	.	+
chr10	44144277	44144305	.	.	-
chr10	45454972	45455086	.	.	-
chr10	45455183	45455486	.	.	+
chr10	45472909	45473431	.	.	-
chr10	45473910	45474260	.	.	-
chr10	45495962	45496645	.	.	+
chr10	45869638	45869795	.	.	+
chr10	46089704	46090355	.	.	-
chr10	46167956	46168246	.	.	-
chr10	46222673	46222731	.	.	+
chr10	47243486	47243511	.	.	-
chr10	50036988	50036989	.	.	+
chr10	5005603	5005640	.	.	+
chr10	50449128	50449275	.	.	+
chr10	5046047	5046094	.	.	-
chr10	50747069	50747171	.	.	-
chr10	50970327	50970372	.	.	-
chr10	5136567	5136653	.	.	+
chr10	51565161	51565260	.	.	+
chr10	51572243	51572467	.	.	+
chr10	51623285	51623351	.	.	-
chr10	51827659	51828138	.	.	+
chr10	52382739	52383659	.	.	-
chr10	52499564	52499769	.	.	+
chr10	52593272	52593688	.	.	+
chr10	52645061	52645454	.	.	-
chr10	52750647	52750690	.	.	+
chr10	53459332	53459378	.	.	-
chr10	53472141	53472142	.	.	-
chr10	5406846	5407154	.	.	+
chr10	5454549	5454679	.	.	+
chr10	5488369	5488602	.	.	+
chr10	560048	560167	.	.	-
chr10	5855256	5855444	.	.	-
chr10	59125111	59125113	.	.	+
chr10	59728143	59728322	.	.	-
chr10	60028824	60029019	.	.	+
chr10	60144882	60145235	.	.	+
chr10	6019917	6020009	.	.	-
chr10	60897644	60897645	.	.	+
chr10	60936187	60936190	.	.	-
chr10	60936378	60936601	.	.	+
chr10	60937041	60937042	.	.	-
chr10	61043323	61043439	.	.	-
chr10	61122247	61122354	.	.	-
chr10	61513137	61513213	.	.	-
chr10	61633090	61633580	.	.	+
chr10	61717176	61717177	.	.	-
chr10	6186881	6186927	.	.	+
chr10	62056611	62057080	.	.	+
chr10	6244543	6245173	.	.	+
chr10	62493164	62493274	.	.	-
chr10	62704117	62704200	.	.	+
chr10	62704442	62704508	.	.	-
chr10	63070915	63070916	.	.	+
chr10	63422682	63422706	.	.	+
chr10	63661442	63661459	.	.	+
chr10	63663545	63663622	.	.	-
chr10	63808690	63809210	.	.	+
chr10	63851593	63851870	.	.	+
chr10	64064134	64064136	.	.	+
chr10	64133704	64134199	.	.	+
chr10	64575988	64576126	.	.	-
chr10	64893014	64893164	.	.	+
chr10	64968044	64968469	.	.	-
chr10	64973576	64973887	.	.	-
chr10	64973898	64974613	.	.	-
chr10	65028421	65029054	.	.	-
chr10	65225378	65225754	.	.	-
chr10	65389811	65390145	.	.	-
chr10	65662783	65663031	.	.	-
chr10	66284763	66284764	.	.	-
chr10	68685763	68685923	.	.	+
chr10	68874834	68874861	.	.	-
chr10	695918	696299	.	.	+
chr10	69597713	69597979	.	.	-
chr10	69598398	69598399	.	.	-
chr10	69605883	69605900	.	.	-
chr10	69634088	69634089	.	.	+
chr10	69640226	69640227	.	.	-
chr10	69641512	69641513	.	.	-
chr10	69834950	69835095	.	.	-
chr10	70066558	70066690	.	.	-
chr10	7007130	7007131	.	.	+
chr10	70091458	70092028	.	.	+
chr10	70166608	70167058	.	.	-
chr10	70167668	70167669	.	.	-
chr10	70259245	70259247	.	.	+
chr10	70433554	70433883	.	.	-
chr10	70480834	70481285	.	.	+
chr10	70661024	70661137	.	.	+
chr10	70715881	70716414	.	.	+
chr10	70748509	70748572	.	.	+
chr10	70846478	70846479	.	.	-
chr10	70847800	70847942	.	.	+
chr10	70883931	70884008	.	.	+
chr10	70939628	70940074	.	.	+
chr10	70980086	70980089	.	.	+
chr10	71078618	71078631	.	.	+
chr10	71211264	71211363	.	.	+
chr10	7129355	7129356	.	.	-
chr10	71389994	71390032	.	.	+
chr10	71561652	71561666	.	.	+
chr10	71889006	71889007	.	.	+
chr10	71892379	71892609	.	.	-
chr10	71930023	71930634	.	.	-
chr10	71992403	71992422	.	.	+
chr10	71992785	71993188	.	.	-
chr10	72142368	72142385	.	.	-
chr10	72164274	72164275	.	.	+
chr10	72575703	72575820	.	.	+
chr10	72648304	72648349	.	.	-
chr10	73079015	73079166	.	.	+
chr10	73528086	73528091	.	.	-
chr10	73577008	73577233	.	.	-
chr10	73579112	73579637	.	.	-
chr10	73594131	73594260	.	.	-
chr10	73610941	73611425	.	.	-
chr10	73725097	73725114	.	.	+
chr10	73975652	73976068	.	.	-
chr10	73975754	73975872	.	.	+
chr10	74033392	74033974	.	.	+
chr10	74114657	74114742	.	.	-
chr10	74130997	74131014	.	.	+
chr10	74169319	74169322	.	.	+
chr10	74385713	74385890	.	.	-
chr10	74856290	74856769	.	.	-
chr10	74870212	74870285	.	.	+
chr10	74880549	74880550	.	.	+
chr10	74905550	74905566	.	.	-
chr10	74927565	74927836	.	.	-
chr10	75007006	75007068	.	.	-
chr10	75012156	75012453	.	.	-
chr10	75012514	75012566	.	.	+
chr10	75160617	75160619	.	.	-
chr10	75173375	75173848	.	.	-
chr10	75255334	75255589	.	.	-
chr10	75336094	75336379	.	.	-
chr10	75361344	75361357	.	.	-
chr10	75385725	75385898	.	.	+
chr10	75490024	75490560	.	.	+
chr10	75490216	75490264	.	.	-
chr10	75504007	75504055	.	.	-
chr10	75504029	75504182	.	.	+
chr10	75532707	75532908	.	.	+
chr10	75541805	75541829	.	.	+
chr10	75545334	75545373	.	.	+
chr10	75602066	75602428	.	.	-
chr10	75649154	75649155	.	.	+
chr10	75757562	75757901	.	.	+
chr10	75910530	75910823	.	.	-
chr10	75910927	75910982	.	.	+
chr10	75930409	75930411	.	.	+
chr10	75936480	75936980	.	.	+
chr10	76351772	76351773	.	.	+
chr10	76773598	76773788	.	.	-
chr10	76780405	76780406	.	.	-
chr10	76803202	76803203	.	.	-
chr10	76871371	76871534	.	.	+
chr10	76957094	76957095	.	.	+
chr10	76970348	76970618	.	.	+
chr10	7708901	7708927	.	.	-
chr10	77159895	77159924	.	.	+
chr10	77463127	77463128	.	.	-
chr10	77850707	77850708	.	.	+
chr10	78215760	78215762	.	.	+
chr10	7829736	7829961	.	.	-
chr10	7830061	7830181	.	.	+
chr10	7860467	7860490	.	.	+
chr10	78743959	78744451	.	.	+
chr10	7878452	7878453	.	.	+
chr10	78787730	78787731	.	.	-
chr10	78913910	78913912	.	.	+
chr10	79273622	79273682	.	.	-
chr10	79273769	79274004	.	.	+
chr10	79663039	79663040	.	.	+
chr10	79789249	79789303	.	.	-
chr10	79793507	79794067	.	.	+
chr10	80223668	80223669	.	.	+
chr10	80412028	80412128	.	.	+
chr10	80412142	80412145	.	.	-
chr10	80456820	80456839	.	.	-
chr10	80999304	80999354	.	.	+
chr10	81002413	81002817	.	.	+
chr10	81058183	81058271	.	.	+
chr10	81487456	81487457	.	.	-
chr10	81833999	81834001	.	.	-
chr10	81838420	81838566	.	.	+
chr10	81960703	81960897	.	.	+
chr10	81961343	81961347	.	.	-
chr10	81965102	81965593	.	.	-
chr10	82167953	82168375	.	.	+
chr10	82361940	82361941	.	.	-
chr10	85022406	85022408	.	.	-
chr10	85899195	85899341	.	.	+
chr10	86320173	86320204	.	.	+
chr10	86469900	86469902	.	.	+
chr10	88143375	88143376	.	.	+
chr10	88514270	88514271	.	.	-
chr10	88515510	88515634	.	.	+
chr10	88717326	88717395	.	.	-
chr10	88728170	88728241	.	.	+
chr10	88730932	88731026	.	.	-
chr10	88731374	88731686	.	.	+
chr10	88731723	88731985	.	.	-
chr10	88854490	88854982	.	.	+
chr10	89102034	89102150	.	.	-
chr10	89264514	89264594	.	.	-
chr10	89264631	89264709	.	.	+
chr10	89419267	89419911	.	.	+
chr10	89420707	89420708	.	.	+
chr10	89574369	89574370	.	.	-
chr10	89577582	89578426	.	.	-
chr10	90342663	90342700	.	.	+
chr10	90342969	90343084	.	.	-
chr10	90611503	90611672	.	.	-
chr10	90712526	90712531	.	.	-
chr10	90750426	90750606	.	.	+
chr10	91011521	91011870	.	.	-
chr10	91061802	91061803	.	.	+
chr10	91152372	91152401	.	.	+
chr10	91174157	91174538	.	.	+
chr10	91295301	91295522	.	.	-
chr10	91316459	91316466	.	.	-
chr10	92631708	92631749	.	.	+
chr10	92922771	92922830	.	.	+
chr10	92980471	92980563	.	.	+
chr10	93169025	93169480	.	.	+
chr10	93392798	93392897	.	.	-
chr10	93683526	93683552	.	.	+
chr10	94000081	94000482	.	.	-
chr10	94050249	94050458	.	.	+
chr10	94050699	94050954	.	.	-
chr10	94051069	94051132	.	.	+
chr10	94219079	94219098	.	.	+
chr10	94333341	94333850	.	.	-
chr10	94608224	94608351	.	.	+
chr10	94728087	94728088	.	.	-
chr10	95044349	95044351	.	.	-
chr10	95196855	95197161	.	.	-
chr10	95241976	95242352	.	.	-
chr10	95360338	95361223	.	.	-
chr10	96028344	96028883	.	.	+
chr10	96122666	96122725	.	.	-
chr10	96147289	96147290	.	.	+
chr10	96975840	96975841	.	.	+
chr10	96990881	96991058	.	.	-
chr10	97050628	97050783	.	.	-
chr10	97199241	97199242	.	.	-
chr10	97277362	97277363	.	.	+
chr10	97321111	97321181	.	.	-
chr10	97416257	97416763	.	.	-
chr10	97453620	97453742	.	.	-
chr10	97667642	97667660	.	.	-
chr10	97889812	97890286	.	.	+
chr10	98141122	98141124	.	.	-
chr10	98346095	98346314	.	.	-
chr10	98510020	98510187	.	.	+
chr10	98558147	98558149	.	.	-
chr10	98592006	98592085	.	.	+
chr10	98592690	98593131	.	.	+
chr10	98645788	98645798	.	.	-
chr10	98668635	98668637	.	.	-
chr10	99022279	99022756	.	.	+
chr10	99052386	99052815	.	.	-
chr10	99159968	99160028	.	.	+
chr10	99160818	99161115	.	.	-
chr10	99185906	99186030	.	.	+
chr10	99197504	99197511	.	.	-
chr10	99205348	99205774	.	.	-
chr10	99257629	99257653	.	.	+
chr10	99258143	99258212	.	.	-
chr10	99393216	99393263	.	.	-
chr10	99446900	99447049	.	.	-
chr10	99496863	99496970	.	.	+
chr10	99581973	99582340	.	.	-
chr10	99582103	99582207	.	.	+
chr10	99894381	99894667	.	.	+
chr1	10003353	10003449	.	.	-
chr1	10003477	10003547	.	.	+
chr1	10007374	10007375	.	.	+
chr1	100232181	100232194	.	.	-
chr1	100479039	100479040	.	.	+
chr1	100503650	100503750	.	.	+
chr1	100598313	100598725	.	.	+
chr1	100694871	100694887	.	.	-
chr1	100715388	100715390	.	.	-
chr1	100731671	100731681	.	.	-
chr1	100731721	100732164	.	.	+
chr1	100818009	100818728	.	.	+
chr1	10093001	10093596	.	.	+
chr1	1009685	1009687	.	.	-
chr1	101185220	101185715	.	.	+
chr1	101361255	101361537	.	.	-
chr1	101361316	101361812	.	.	+
chr1	101491337	101491352	.	.	-
chr1	101491410	101491493	.	.	+
chr1	101702323	101702579	.	.	+
chr1	102252854	102252855	.	.	-
chr1	102378225	102378226	.	.	+
chr1	102641919	102641920	.	.	+
chr1	103362476	103362479	.	.	+
chr1	104068296	104068880	.	.	+
chr1	104113767	104114257	.	.	+
chr1	104159899	104160190	.	.	+
chr1	10445072	10445073	.	.	-
chr1	10459077	10459165	.	.	+
chr1	104898456	104898457	.	.	-
chr1	10490781	10490854	.	.	+
chr1	10501371	10501381	.	.	+
chr1	10532297	10532633	.	.	-
chr1	10534998	10535020	.	.	+
chr1	105694594	105694595	.	.	-
chr1	105816435	105816437	.	.	-
chr1	106479361	106479362	.	.	-
chr1	107599315	107599380	.	.	+
chr1	108231120	108231126	.	.	-
chr1	10856648	10856707	.	.	-
chr1	108742678	108742843	.	.	-
chr1	109234823	109235216	.	.	+
chr1	109289247	109289348	.	.	+
chr1	109506034	109506142	.	.	-
chr1	109618571	109618932	.	.	-
chr1	109632924	109633606	.	.	+
chr1	109642687	109643150	.	.	+
chr1	109656495	109656931	.	.	+
chr1	109731726	109732252	.	.	+
chr1	109756492	109757013	.	.	+
chr1	1098205	1098360	.	.	+
chr1	109837269	109837680	.	.	-
chr1	109968990	109969430	.	.	-
chr1	110026577	110026602	.	.	+
chr1	110036683	110036749	.	.	+
chr1	1100458	1100463	.	.	+
chr1	110091049	110091131	.	.	-
chr1	110091194	110091345	.	.	+
chr11	101000288	101000714	.	.	-
chr11	101620337	101620338	.	.	-
chr1	110162431	110162588	.	.	+
chr1	110163687	110163929	.	.	+
chr1	110167461	110167745	.	.	+
chr11	1016837	1018724	.	.	-
chr1	11017294	11017324	.	.	-
chr11	101785484	101785859	.	.	-
chr11	101785731	101786093	.	.	+
chr1	11018748	11018965	.	.	-
chr11	1019171	1019483	.	.	-
chr11	101918033	101918187	.	.	+
chr11	1019763	1020224	.	.	-
chr1	110198325	110198984	.	.	+
chr1	110210641	110210726	.	.	+
chr11	102188207	102188283	.	.	+
chr11	102217628	102218250	.	.	+
chr1	110230418	110230470	.	.	+
chr11	102323068	102323460	.	.	-
chr11	102401327	102401539	.	.	-
chr11	102490030	102490031	.	.	-
chr11	102651357	102651359	.	.	-
chr11	102668781	102668894	.	.	-
chr1	110282551	110283048	.	.	-
chr11	102962726	102962935	.	.	-
chr11	102980083	102980284	.	.	+
chr11	103037532	103037533	.	.	+
chr11	1031733	1032022	.	.	-
chr11	10325365	10325401	.	.	-
chr11	10326510	10326772	.	.	+
chr11	10327210	10327535	.	.	+
chr11	10329405	10329801	.	.	+
chr11	1036707	1036720	.	.	-
chr11	10384038	10384039	.	.	+
chr11	104565354	104565357	.	.	-
chr11	10476577	10476996	.	.	+
chr11	10477466	10477865	.	.	-
chr11	10477602	10477939	.	.	+
chr11	104839243	104839359	.	.	-
chr11	105145313	105145320	.	.	-
chr1	110527386	110527899	.	.	+
chr11	105480720	105480860	.	.	+
chr11	10562282	10562785	.	.	-
chr11	105892643	105893014	.	.	-
chr11	105947652	105948332	.	.	-
chr11	105948307	105948434	.	.	+
chr11	106047754	106047973	.	.	+
chr1	110693420	110693466	.	.	+
chr1	11072681	11072751	.	.	+
chr11	107436460	107436461	.	.	-
chr11	10772462	10772825	.	.	+
chr11	107729511	107729539	.	.	-
chr11	107799145	107799337	.	.	+
chr11	107879601	107880077	.	.	+
chr11	107992244	107992326	.	.	+
chr11	108093289	108093386	.	.	-
chr11	108093514	108094244	.	.	+
chr11	10823317	10823973	.	.	-
chr11	10830254	10830904	.	.	-
chr11	108338153	108338235	.	.	-
chr11	108464289	108464417	.	.	-
chr11	108535779	108535858	.	.	+
chr11	10879342	10879620	.	.	-
chr11	10879747	10880046	.	.	+
chr1	110882043	110882116	.	.	+
chr11	109256248	109256249	.	.	-
chr1	110950038	110950376	.	.	-
chr1	110952117	110952121	.	.	+
chr11	111170395	111170441	.	.	-
chr11	111473139	111473288	.	.	+
chr11	111636643	111637143	.	.	-
chr11	111742003	111742306	.	.	-
chr11	111749615	111750230	.	.	-
chr11	111749682	111749930	.	.	+
chr11	111750189	111750267	.	.	+
chr11	111782328	111782667	.	.	-
chr11	111789632	111790000	.	.	+
chr11	111797990	111798050	.	.	+
chr11	111852960	111852963	.	.	+
chr11	111895865	111896468	.	.	+
chr11	111944728	111944907	.	.	-
chr11	111944815	111945049	.	.	+
chr11	111957318	111957638	.	.	+
chr11	111957456	111957529	.	.	-
chr11	112034810	112034819	.	.	-
chr11	112046226	112046268	.	.	+
chr11	112096781	112097400	.	.	+
chr11	112831969	112832227	.	.	+
chr11	113526348	113526663	.	.	+
chr11	113622448	113622449	.	.	+
chr11	113637249	113637254	.	.	+
chr11	113641393	113641743	.	.	+
chr11	113644394	113644803	.	.	-
chr11	113663433	113663434	.	.	+
chr11	113706668	113706669	.	.	+
chr11	113713157	113713160	.	.	+
chr11	113717570	113717571	.	.	+
chr11	113723498	113723913	.	.	+
chr11	113731394	113731697	.	.	+
chr11	113734228	113734233	.	.	+
chr11	113734816	113735290	.	.	+
chr11	113845877	113845932	.	.	+
chr11	113930274	113930620	.	.	+
chr11	114167028	114167249	.	.	+
chr11	114271093	114271284	.	.	-
chr11	114271252	114271759	.	.	+
chr11	114309955	114310579	.	.	+
chr11	114334494	114334495	.	.	+
chr11	11459230	11459231	.	.	+
chr11	114650137	114650209	.	.	+
chr11	11477134	11477135	.	.	+
chr1	111506528	111506731	.	.	-
chr11	115158191	115158251	.	.	-
chr11	115320252	115320258	.	.	+
chr11	115374759	115375174	.	.	-
chr11	11584484	11584491	.	.	+
chr1	11159891	11159962	.	.	-
chr11	116150611	116150612	.	.	+
chr11	116273622	116273623	.	.	-
chr11	116432823	116432824	.	.	+
chr11	11643551	11643558	.	.	-
chr11	116643692	116643760	.	.	-
chr1	111682376	111682786	.	.	-
chr1	111682428	111682877	.	.	+
chr11	117015005	117015049	.	.	+
chr11	117049458	117049459	.	.	+
chr11	117070023	117070119	.	.	+
chr11	117102757	117103260	.	.	-
chr11	117102919	117103411	.	.	+
chr11	117198569	117198867	.	.	+
chr1	111747008	111747200	.	.	-
chr11	117695032	117695756	.	.	-
chr11	117698725	117698899	.	.	-
chr11	117699428	117699478	.	.	-
chr11	117699539	117699627	.	.	+
chr11	117708408	117708462	.	.	+
chr11	117736494	117736496	.	.	+
chr11	117747123	117747752	.	.	-
chr11	117857107	117857110	.	.	+
chr11	117937952	117937959	.	.	+
chr11	118122639	118123080	.	.	-
chr11	118135008	118135100	.	.	-
chr11	118230292	118230667	.	.	+
chr11	118245862	118246241	.	.	-
chr11	118272079	118272526	.	.	+
chr11	118273560	118273563	.	.	-
chr11	118276740	118276741	.	.	-
chr11	118325855	118326288	.	.	+
chr11	118351540	118351541	.	.	-
chr11	118353153	118353207	.	.	-
chr11	118386566	118386567	.	.	-
chr11	118401906	118401939	.	.	+
chr11	118436604	118436765	.	.	-
chr11	118443065	118443189	.	.	+
chr11	118455703	118455704	.	.	-
chr11	118464977	118464978	.	.	-
chr11	118478305	118478347	.	.	+
chr11	118479431	118479567	.	.	+
chr11	11863155	11863601	.	.	+
chr11	118661608	118661923	.	.	-
chr11	118672026	118672027	.	.	-
chr11	118710822	118710823	.	.	+
chr11	118719004	118719006	.	.	-
chr11	118754351	118754353	.	.	-
chr11	118771410	118771845	.	.	-
chr11	118780162	118780164	.	.	+
chr11	118790250	118790520	.	.	-
chr11	118868367	118868895	.	.	+
chr1	111888896	111889491	.	.	+
chr11	118889023	118889399	.	.	-
chr11	118889438	118889557	.	.	+
chr11	118900120	118900234	.	.	-
chr11	118901493	118901608	.	.	-
chr11	118927525	118927942	.	.	-
chr11	118928147	118928346	.	.	+
chr11	118938287	118938705	.	.	+
chr11	118955561	118955662	.	.	+
chr11	118965931	118966175	.	.	-
chr11	118972529	118972594	.	.	-
chr11	118978062	118978178	.	.	+
chr11	118992285	118992581	.	.	+
chr11	119187821	119188326	.	.	-
chr11	119205218	119205389	.	.	+
chr11	119293876	119293912	.	.	-
chr1	111991502	111992321	.	.	-
chr1	111991700	111992195	.	.	+
chr11	119993467	119993773	.	.	-
chr11	120195999	120196018	.	.	+
chr11	120276823	120276846	.	.	+
chr11	120583553	120583554	.	.	-
chr11	121023902	121024022	.	.	-
chr11	121163364	121163625	.	.	+
chr11	121217958	121218473	.	.	+
chr11	121323022	121323446	.	.	+
chr11	121404221	121404222	.	.	-
chr11	121444738	121444739	.	.	-
chr1	112162410	112162507	.	.	+
chr11	121750162	121750163	.	.	+
chr11	121971128	121971169	.	.	-
chr11	121972476	121972855	.	.	-
chr11	122565379	122565677	.	.	+
chr11	122575365	122575366	.	.	-
chr11	122593414	122593416	.	.	+
chr11	122753621	122753798	.	.	+
chr1	112282215	112282473	.	.	+
chr11	122929029	122929345	.	.	-
chr11	122929443	122929915	.	.	-
chr11	122930191	122930972	.	.	-
chr11	122932504	122933224	.	.	-
chr11	122933188	122933374	.	.	+
chr1	112298522	112298544	.	.	+
chr11	123612123	123612386	.	.	-
chr11	123986101	123986474	.	.	+
chr11	12399138	12399192	.	.	+
chr11	124492741	124492832	.	.	+
chr11	124543612	124543766	.	.	-
chr1	112463093	112463329	.	.	+
chr11	124981501	124981542	.	.	-
chr11	125034601	125034651	.	.	+
chr11	125131662	125131678	.	.	+
chr11	125439392	125439424	.	.	+
chr11	125462362	125462403	.	.	-
chr11	125462724	125462977	.	.	+
chr11	125757562	125757618	.	.	+
chr11	125773032	125773116	.	.	-
chr11	125774378	125774409	.	.	+
chr11	125983685	125983736	.	.	+
chr11	125986141	125986168	.	.	+
chr11	126081537	126081560	.	.	-
chr11	126081663	126081704	.	.	+
chr11	126138683	126138854	.	.	-
chr11	126139048	126139078	.	.	+
chr11	126152966	126153017	.	.	+
chr11	126173948	126173959	.	.	+
chr11	126819303	126819304	.	.	-
chr11	126870664	126870706	.	.	-
chr11	127811656	127811749	.	.	-
chr11	12785723	12786185	.	.	+
chr11	12797992	12797994	.	.	+
chr11	128337237	128337651	.	.	-
chr11	128391872	128392145	.	.	-
chr11	128894031	128894295	.	.	-
chr1	112938550	112938879	.	.	+
chr11	12959928	12960334	.	.	+
chr11	129685707	129686077	.	.	+
chr11	129765035	129765485	.	.	-
chr11	129872690	129872748	.	.	-
chr11	130076028	130076029	.	.	+
chr11	130114415	130114418	.	.	+
chr11	130183851	130184329	.	.	-
chr11	130786317	130786388	.	.	-
chr11	131556655	131557051	.	.	+
chr1	113161732	113161763	.	.	-
chr1	113162133	113162569	.	.	+
chr1	113162262	113162326	.	.	-
chr1	113217087	113217590	.	.	+
chr1	11322563	11322608	.	.	-
chr1	113249703	113249768	.	.	-
chr11	1330983	1331084	.	.	+
chr1	11333254	11334027	.	.	+
chr11	133896876	133896877	.	.	+
chr11	133938908	133938999	.	.	+
chr11	134093860	134093896	.	.	-
chr11	134094417	134094454	.	.	-
chr11	134095340	134095380	.	.	-
chr11	134123148	134123301	.	.	-
chr11	134201881	134201958	.	.	+
chr11	134252511	134252544	.	.	-
chr11	13484528	13484844	.	.	-
chr11	134852818	134852819	.	.	+
chr1	113498815	113498867	.	.	-
chr1	113615789	113615843	.	.	+
chr1	113638190	113638191	.	.	-
chr11	13690205	13690271	.	.	+
chr1	113933063	113933157	.	.	+
chr1	114302071	114302537	.	.	-
chr1	114303784	114303809	.	.	+
chr11	1430644	1430698	.	.	+
chr1	114354840	114354911	.	.	-
chr11	14358636	14358804	.	.	-
chr1	114447408	114447716	.	.	-
chr1	114472461	114472915	.	.	+
chr1	114483002	114483330	.	.	+
chr11	14521330	14521436	.	.	-
chr1	114522030	114522108	.	.	+
chr11	14541469	14542064	.	.	-
chr11	14912758	14913229	.	.	-
chr1	114987572	114988008	.	.	-
chr1	115090124	115090132	.	.	+
chr11	15095138	15095143	.	.	+
chr1	115124039	115124291	.	.	-
chr1	115212624	115212997	.	.	-
chr1	115259348	115259401	.	.	-
chr1	115300370	115300911	.	.	-
chr1	115323083	115323524	.	.	-
chr1	11539211	11539213	.	.	+
chr1	115632077	115632114	.	.	-
chr1	115632198	115632742	.	.	+
chr11	15841381	15841382	.	.	-
chr1	115880856	115880858	.	.	-
chr11	15956631	15956867	.	.	-
chr11	16332606	16332607	.	.	+
chr11	16419040	16419341	.	.	-
chr11	16625474	16625867	.	.	-
chr1	1167290	1167447	.	.	-
chr11	16759984	16760024	.	.	-
chr11	16760147	16760672	.	.	+
chr11	16863798	16863942	.	.	+
chr1	116915864	116916087	.	.	+
chr1	116961182	116961220	.	.	-
chr11	16996586	16996847	.	.	-
chr11	17035920	17035977	.	.	-
chr11	17098734	17099268	.	.	-
chr1	117113610	117113685	.	.	-
chr1	11714538	11714961	.	.	+
chr1	117210299	117210330	.	.	-
chr11	17229418	17229559	.	.	-
chr11	17229624	17230124	.	.	+
chr11	17298253	17298588	.	.	+
chr1	11734213	11734215	.	.	+
chr11	17373309	17373569	.	.	+
chr1	11740552	11741198	.	.	-
chr11	17418617	17419312	.	.	-
chr11	17428501	17428946	.	.	-
chr11	17429935	17430003	.	.	-
chr11	17434851	17435241	.	.	-
chr11	17449590	17449939	.	.	-
chr11	17450601	17450934	.	.	-
chr11	17452358	17452644	.	.	-
chr11	17464291	17464355	.	.	-
chr11	17464740	17465127	.	.	-
chr11	17472104	17472105	.	.	-
chr11	17485126	17485127	.	.	+
chr11	17498291	17498826	.	.	-
chr11	175602	175887	.	.	-
chr11	17565905	17565980	.	.	-
chr1	117602924	117603178	.	.	+
chr1	117624974	117624976	.	.	-
chr11	1773386	1773390	.	.	+
chr1	117753501	117753549	.	.	-
chr11	1784687	1785209	.	.	-
chr1	117910104	117910505	.	.	+
chr1	11796132	11796247	.	.	+
chr11	18033987	18034570	.	.	-
chr1	11806959	11807443	.	.	+
chr11	18127571	18127631	.	.	-
chr11	18128173	18128174	.	.	+
chr1	118148668	118148949	.	.	+
chr11	18343678	18344050	.	.	-
chr11	18343813	18344269	.	.	+
chr11	18415934	18416146	.	.	+
chr1	118471516	118471743	.	.	+
chr1	118472200	118472285	.	.	-
chr1	118472357	118472593	.	.	+
chr11	18548164	18548896	.	.	+
chr11	18548373	18548506	.	.	-
chr11	18610215	18610482	.	.	-
chr1	11865529	11866043	.	.	-
chr11	18655761	18656380	.	.	-
chr1	11866158	11866518	.	.	+
chr11	18728537	18728578	.	.	-
chr11	19138649	19138959	.	.	+
chr1	11968207	11968210	.	.	+
chr1	119682867	119683294	.	.	-
chr11	1968538	1968590	.	.	+
chr11	19736301	19736508	.	.	+
chr1	11994745	11994815	.	.	+
chr11	20044346	20044519	.	.	+
chr1	120062203	120062204	.	.	+
chr11	2019021	2019072	.	.	-
chr1	120254502	120254636	.	.	+
chr1	120342106	120342625	.	.	-
chr11	20385262	20385735	.	.	+
chr1	12040304	12040508	.	.	+
chr11	20410045	20410140	.	.	+
chr11	20412650	20412651	.	.	+
chr1	120451172	120451173	.	.	+
chr11	207344	207407	.	.	-
chr11	207481	207719	.	.	+
chr1	12079532	12079560	.	.	+
chr1	120837971	120838365	.	.	-
chr11	208785	208841	.	.	+
chr1	120905972	120905999	.	.	+
chr11	2152804	2153644	.	.	-
chr11	21569690	21570000	.	.	-
chr11	2159469	2159878	.	.	-
chr11	21748727	21748729	.	.	+
chr11	2179595	2179615	.	.	-
chr11	2181016	2181208	.	.	+
chr11	2181046	2181414	.	.	-
chr11	2181944	2182495	.	.	-
chr11	2182607	2182715	.	.	-
chr11	22214617	22214720	.	.	+
chr11	22359283	22359561	.	.	+
chr11	22646798	22647389	.	.	-
chr11	22851346	22851408	.	.	-
chr1	12290088	12290156	.	.	+
chr11	2290308	2290499	.	.	-
chr11	2292771	2292772	.	.	-
chr11	2310279	2310447	.	.	-
chr11	2338834	2339001	.	.	-
chr11	236545	237035	.	.	+
chr11	2397397	2397490	.	.	+
chr11	2421445	2421538	.	.	-
chr11	2421902	2422261	.	.	+
chr1	1242528	1242529	.	.	+
chr11	2438000	2438059	.	.	-
chr1	1259999	1260068	.	.	-
chr1	12677239	12677699	.	.	-
chr1	12678651	12679158	.	.	-
chr11	27490717	27490826	.	.	+
chr11	27528101	27528343	.	.	-
chr11	27528359	27528416	.	.	+
chr11	2790124	2790125	.	.	-
chr11	27912639	27912640	.	.	-
chr11	28129888	28129943	.	.	+
chr11	28131531	28131878	.	.	+
chr11	287699	288307	.	.	+
chr11	2906633	2907008	.	.	-
chr11	2923516	2923538	.	.	+
chr11	2950627	2950655	.	.	-
chr11	3012899	3013999	.	.	-
chr11	30344628	30344701	.	.	+
chr11	3078408	3078677	.	.	-
chr11	307921	308333	.	.	+
chr1	1310558	1310598	.	.	-
chr11	31391272	31391321	.	.	-
chr11	31391359	31391563	.	.	+
chr11	314016	314126	.	.	+
chr11	31531068	31531479	.	.	+
chr11	31531103	31531180	.	.	-
chr11	31825218	31825788	.	.	-
chr11	31832481	31832879	.	.	-
chr11	31838075	31838131	.	.	+
chr11	31839435	31839675	.	.	-
chr11	320669	320912	.	.	-
chr11	32605340	32605434	.	.	+
chr11	33182996	33183037	.	.	-
chr11	33231145	33231146	.	.	-
chr11	33278898	33278976	.	.	+
chr11	33279840	33280323	.	.	+
chr1	1334928	1335011	.	.	+
chr11	33744003	33744176	.	.	-
chr11	33757573	33758032	.	.	-
chr11	33795869	33796077	.	.	-
chr11	33912813	33912845	.	.	-
chr11	3400331	3400444	.	.	-
chr11	34073218	34073279	.	.	+
chr11	34127052	34127311	.	.	+
chr1	1342455	1342683	.	.	-
chr11	34379546	34379557	.	.	-
chr11	34460323	34460535	.	.	+
chr11	34642592	34642752	.	.	+
chr11	34645766	34645858	.	.	+
chr11	34937607	34937958	.	.	-
chr11	34937967	34938213	.	.	+
chr11	3498237	3498299	.	.	-
chr11	35160221	35160614	.	.	-
chr11	35160249	35161208	.	.	+
chr11	35169729	35170151	.	.	+
chr11	35197775	35198271	.	.	+
chr11	35201895	35201897	.	.	+
chr11	35211420	35211520	.	.	+
chr11	35221350	35221946	.	.	+
chr11	35222866	35223216	.	.	+
chr11	35224649	35225113	.	.	+
chr11	35236427	35236452	.	.	+
chr11	35250492	35250964	.	.	+
chr11	35425949	35426187	.	.	-
chr11	35546895	35547164	.	.	-
chr1	1356655	1356691	.	.	-
chr11	35965611	35966091	.	.	+
chr11	36310922	36310991	.	.	-
chr11	36397891	36398177	.	.	+
chr11	36531778	36531842	.	.	-
chr11	37008826	37008828	.	.	+
chr11	37301133	37301134	.	.	+
chr11	3818737	3818784	.	.	-
chr11	3819127	3819447	.	.	+
chr11	38519162	38519163	.	.	+
chr11	38596616	38596617	.	.	+
chr11	3862159	3862212	.	.	-
chr11	3876374	3876438	.	.	+
chr1	1397816	1398341	.	.	+
chr1	14075870	14075933	.	.	+
chr1	14106343	14107473	.	.	+
chr11	4115820	4116094	.	.	+
chr1	1413227	1413275	.	.	+
chr11	417338	417397	.	.	-
chr1	14322696	14322698	.	.	+
chr11	43333469	43333614	.	.	+
chr11	43380468	43380814	.	.	+
chr1	143467608	143467651	.	.	-
chr11	43569136	43569168	.	.	+
chr11	43600404	43600971	.	.	+
chr11	43701980	43702378	.	.	+
chr11	43902298	43902646	.	.	+
chr1	143913810	143913823	.	.	+
chr11	4414897	4414944	.	.	-
chr11	441946	442146	.	.	-
chr1	144520984	144521238	.	.	-
chr1	144534037	144534039	.	.	+
chr11	44587125	44587220	.	.	+
chr1	144593676	144594007	.	.	+
chr1	144596400	144596405	.	.	-
chr1	144931768	144932486	.	.	-
chr1	144944671	144944673	.	.	+
chr1	145039611	145040029	.	.	-
chr1	145040105	145040106	.	.	+
chr1	145096292	145096583	.	.	+
chr1	145209095	145209390	.	.	+
chr11	45307456	45307864	.	.	-
chr1	145382727	145382758	.	.	+
chr1	145438437	145439069	.	.	+
chr1	145439810	145440103	.	.	+
chr1	145470358	145470420	.	.	-
chr1	145507496	145507886	.	.	+
chr1	145516181	145516387	.	.	+
chr1	145575261	145575291	.	.	+
chr1	145575987	145576071	.	.	+
chr1	145589429	145589444	.	.	-
chr1	145610722	145610778	.	.	+
chr1	145610874	145611095	.	.	-
chr1	145727441	145727725	.	.	+
chr1	145826938	145827103	.	.	-
chr11	45939379	45939678	.	.	-
chr11	46113770	46113773	.	.	-
chr11	46142504	46143060	.	.	-
chr11	4614868	4614869	.	.	-
chr11	4629377	4629524	.	.	-
chr11	46299163	46299625	.	.	+
chr11	46383077	46383163	.	.	+
chr11	46384848	46385361	.	.	+
chr11	46402442	46402821	.	.	+
chr11	46403254	46403586	.	.	+
chr1	146556039	146556304	.	.	-
chr11	46615186	46615630	.	.	-
chr11	46638822	46639202	.	.	+
chr1	146643736	146644168	.	.	-
chr1	146644274	146644815	.	.	+
chr11	466570	466571	.	.	-
chr1	146696930	146696959	.	.	-
chr11	46700299	46700673	.	.	-
chr1	146714012	146714765	.	.	+
chr11	46721877	46722246	.	.	-
chr11	46722576	46722612	.	.	+
chr11	46867476	46867849	.	.	-
chr11	46958268	46958778	.	.	+
chr1	146989698	146989699	.	.	-
chr1	147013270	147013415	.	.	+
chr1	147071420	147071461	.	.	-
chr1	147072011	147072057	.	.	+
chr1	147084446	147084839	.	.	+
chr1	147142262	147142651	.	.	-
chr11	47198405	47198479	.	.	-
chr11	47236492	47236654	.	.	+
chr11	47270138	47270390	.	.	-
chr11	47291206	47291735	.	.	+
chr11	47291535	47291944	.	.	-
chr11	47304117	47304521	.	.	+
chr11	47400070	47400092	.	.	-
chr1	147400426	147400578	.	.	+
chr11	47447712	47448017	.	.	-
chr11	47574618	47574644	.	.	-
chr11	47600207	47600540	.	.	-
chr11	47600563	47600649	.	.	+
chr11	47611762	47611799	.	.	-
chr11	4765036	4765476	.	.	-
chr11	47664028	47664144	.	.	-
chr11	47730231	47730235	.	.	+
chr1	147735477	147735954	.	.	+
chr1	147806888	147806891	.	.	-
chr1	147834664	147834665	.	.	-
chr11	47869867	47870028	.	.	-
chr1	147994144	147994327	.	.	+
chr11	48035369	48035807	.	.	+
chr1	148176318	148176423	.	.	-
chr1	148193282	148193338	.	.	+
chr1	148241463	148241700	.	.	+
chr1	148555972	148556043	.	.	+
chr1	148605070	148605072	.	.	-
chr1	149145432	149145433	.	.	-
chr1	149223758	149224396	.	.	-
chr1	149399054	149399230	.	.	-
chr1	149404959	149404960	.	.	+
chr1	149425367	149425368	.	.	+
chr1	149514238	149514256	.	.	-
chr1	149783752	149783984	.	.	-
chr1	149785065	149785250	.	.	-
chr1	149857960	149858244	.	.	-
chr1	149858414	149858895	.	.	+
chr1	149859319	149859577	.	.	-
chr1	149859764	149859765	.	.	+
chr1	149871120	149871547	.	.	+
chr11	49885964	49885980	.	.	+
chr1	149889367	149889436	.	.	-
chr1	149899656	149899712	.	.	-
chr1	149899754	149899823	.	.	+
chr1	149908225	149908607	.	.	-
chr1	149908738	149908775	.	.	-
chr1	149982479	149982700	.	.	-
chr1	150019777	150019799	.	.	+
chr1	150039315	150039710	.	.	-
chr1	150039425	150039917	.	.	+
chr1	150183927	150183930	.	.	+
chr1	150203795	150203796	.	.	+
chr1	150207084	150207090	.	.	+
chr1	150208316	150208524	.	.	-
chr1	150219530	150219532	.	.	+
chr1	150241116	150241475	.	.	-
chr1	150254922	150255287	.	.	+
chr1	150265899	150266342	.	.	+
chr1	150277036	150277052	.	.	+
chr1	150293925	150294023	.	.	+
chr1	150336593	150337344	.	.	+
chr1	150386439	150386893	.	.	+
chr1	150408929	150408935	.	.	+
chr1	150418396	150418871	.	.	+
chr1	150427194	150427195	.	.	+
chr1	150459875	150459922	.	.	+
chr1	150474167	150474169	.	.	+
chr1	150480534	150480586	.	.	+
chr1	150497814	150497815	.	.	+
chr1	150509886	150509915	.	.	+
chr1	150513230	150513231	.	.	+
chr1	150533676	150534092	.	.	+
chr1	150539129	150539155	.	.	+
chr1	150548399	150548957	.	.	-
chr1	150551058	150551385	.	.	-
chr1	150551220	150551284	.	.	+
chr1	150551443	150552150	.	.	-
chr1	150552291	150552393	.	.	+
chr1	150554201	150554208	.	.	+
chr1	150568061	150568063	.	.	+
chr1	150571445	150571446	.	.	+
chr1	150601521	150602109	.	.	-
chr1	150602267	150602332	.	.	+
chr1	150616232	150616254	.	.	-
chr1	150636481	150636482	.	.	+
chr1	150669561	150669690	.	.	-
chr1	150672160	150672165	.	.	-
chr11	506766	507286	.	.	-
chr1	150713025	150713030	.	.	-
chr1	150738192	150738434	.	.	-
chr1	150780704	150780795	.	.	-
chr1	150848832	150849220	.	.	-
chr1	150858503	150858508	.	.	-
chr1	150898771	150898922	.	.	+
chr1	150922915	150922916	.	.	-
chr1	150947121	150947222	.	.	-
chr1	150954498	150954555	.	.	+
chr1	150978864	150979378	.	.	-
chr1	150980892	150981033	.	.	+
chr1	1509957	1510047	.	.	-
chr1	150998119	150998120	.	.	-
chr1	151020176	151020324	.	.	+
chr1	151032045	151032134	.	.	-
chr1	151032740	151032983	.	.	+
chr1	151042885	151043237	.	.	+
chr1	151084553	151084554	.	.	+
chr1	151096181	151096182	.	.	+
chr1	151138516	151138628	.	.	+
chr1	151146545	151146547	.	.	+
chr1	151151928	151151929	.	.	+
chr1	151162620	151162677	.	.	-
chr1	151164311	151164312	.	.	+
chr1	151168670	151168671	.	.	-
chr1	151171000	151171545	.	.	+
chr1	151227192	151227511	.	.	+
chr1	151254148	151254879	.	.	-
chr1	151254742	151255125	.	.	+
chr1	151273346	151273360	.	.	-
chr1	151299437	151300117	.	.	-
chr1	151309721	151309723	.	.	+
chr1	151319329	151319758	.	.	-
chr1	151326548	151326549	.	.	-
chr1	151345178	151345189	.	.	-
chr1	151348690	151348691	.	.	-
chr1	151372005	151372527	.	.	+
chr1	151415815	151415816	.	.	+
chr1	151431624	151431700	.	.	-
chr1	151480352	151480354	.	.	-
chr1	151483892	151483962	.	.	+
chr1	151512758	151513041	.	.	+
chr1	151542710	151542918	.	.	-
chr1	151580577	151580578	.	.	-
chr1	151689136	151689291	.	.	-
chr1	151693997	151694010	.	.	+
chr1	151735825	151735979	.	.	-
chr1	151740615	151740617	.	.	-
chr1	151744716	151744723	.	.	-
chr1	151762960	151762978	.	.	-
chr1	151803359	151803597	.	.	+
chr1	151804223	151804335	.	.	-
chr1	151965139	151965440	.	.	+
chr1	151966263	151966335	.	.	-
chr1	152009392	152009511	.	.	-
chr1	152161778	152161815	.	.	+
chr1	153029987	153029989	.	.	-
chr1	153508346	153508798	.	.	-
chr1	153518280	153518282	.	.	-
chr1	153539257	153539310	.	.	+
chr1	153581478	153581512	.	.	-
chr1	153585455	153585646	.	.	-
chr1	153588789	153588814	.	.	-
chr1	153599714	153600098	.	.	-
chr1	153606496	153606983	.	.	+
chr1	153606807	153606913	.	.	-
chr1	153631137	153631479	.	.	+
chr1	153643416	153643504	.	.	-
chr1	153674148	153674149	.	.	+
chr1	153675838	153675848	.	.	+
chr1	153700525	153700552	.	.	+
chr1	153755849	153756247	.	.	-
chr1	153841358	153841374	.	.	-
chr1	153862817	153862818	.	.	+
chr1	153930718	153931088	.	.	-
chr1	153935797	153936222	.	.	-
chr1	153936172	153936215	.	.	+
chr1	153949760	153950179	.	.	-
chr1	153958721	153958871	.	.	-
chr1	153963089	153963456	.	.	+
chr1	153984118	153984119	.	.	-
chr1	154064702	154064703	.	.	-
chr1	154119953	154119954	.	.	-
chr1	154129811	154130046	.	.	-
chr1	154155605	154155796	.	.	-
chr1	154192852	154193277	.	.	-
chr1	154193220	154193838	.	.	+
chr1	154197557	154197611	.	.	+
chr1	154202645	154202647	.	.	-
chr1	154223528	154224023	.	.	+
chr1	154245061	154245524	.	.	+
chr1	154249976	154249977	.	.	-
chr1	154300987	154300988	.	.	-
chr1	154378362	154378974	.	.	+
chr1	154378393	154378658	.	.	-
chr1	154574302	154574772	.	.	-
chr1	154600366	154600476	.	.	-
chr1	15479009	15479048	.	.	+
chr1	15479061	15479228	.	.	+
chr1	15479616	15480108	.	.	-
chr1	154909095	154909494	.	.	-
chr1	154928271	154928639	.	.	-
chr1	154934210	154934258	.	.	-
chr1	154942847	154943287	.	.	-
chr1	154946804	154946882	.	.	-
chr1	154947135	154947178	.	.	+
chr1	154955793	154955844	.	.	+
chr1	154975093	154975326	.	.	+
chr1	154997967	154997968	.	.	-
chr1	155099871	155100722	.	.	+
chr1	155107850	155108769	.	.	+
chr1	155112974	155113045	.	.	-
chr1	155145366	155145809	.	.	-
chr1	155147063	155147081	.	.	+
chr1	155160834	155161581	.	.	+
chr1	155161019	155161220	.	.	-
chr1	155161679	155161808	.	.	-
chr1	155162673	155162765	.	.	-
chr1	155178565	155179065	.	.	+
chr1	155211033	155211048	.	.	-
chr1	155214240	155214482	.	.	-
chr1	155231965	155232224	.	.	-
chr1	155278630	155278770	.	.	+
chr1	155290676	155290754	.	.	+
chr1	155294233	155294310	.	.	+
chr1	155448570	155449182	.	.	-
chr1	155532194	155532928	.	.	-
chr1	155532760	155533139	.	.	+
chr1	155658098	155658793	.	.	-
chr1	155658835	155658916	.	.	+
chr1	155826964	155827047	.	.	-
chr1	155829185	155829427	.	.	+
chr1	155880746	155881213	.	.	-
chr1	155904163	155904227	.	.	-
chr1	155947965	155948727	.	.	-
chr1	155953141	155953497	.	.	-
chr1	155989845	155989962	.	.	-
chr1	155990395	155991190	.	.	-
chr1	156024524	156024874	.	.	+
chr1	156030801	156031139	.	.	+
chr1	156060701	156060702	.	.	+
chr11	560719	560738	.	.	-
chr1	156076243	156076359	.	.	-
chr1	156076494	156076510	.	.	+
chr1	156084130	156084939	.	.	+
chr11	560964	561016	.	.	+
chr1	156108885	156109351	.	.	+
chr11	56120770	56120771	.	.	-
chr1	156163872	156164282	.	.	+
chr1	156182779	156183129	.	.	+
chr1	156265435	156265480	.	.	-
chr1	156299259	156299260	.	.	-
chr1	156307943	156308204	.	.	-
chr1	156368691	156368692	.	.	-
chr1	156426467	156426768	.	.	+
chr1	156445933	156446971	.	.	-
chr11	56457679	56457744	.	.	+
chr1	156561562	156561641	.	.	+
chr1	156571235	156571274	.	.	-
chr1	156675373	156675376	.	.	-
chr1	156698155	156698260	.	.	-
chr1	156698624	156698714	.	.	+
chr1	156710683	156710944	.	.	-
chr1	156716576	156716599	.	.	+
chr1	156718150	156718617	.	.	-
chr1	156737289	156737450	.	.	+
chr1	156863492	156863510	.	.	+
chr11	5706129	5706286	.	.	-
chr11	57089778	57090141	.	.	-
chr11	57103064	57103344	.	.	-
chr1	157108141	157108398	.	.	-
chr11	57194548	57194907	.	.	-
chr11	572445	572744	.	.	-
chr11	57282289	57282649	.	.	-
chr11	57298175	57298238	.	.	-
chr11	57335096	57335180	.	.	-
chr11	57364989	57365232	.	.	+
chr11	57365665	57365726	.	.	+
chr11	57367350	57367354	.	.	+
chr11	57409521	57409522	.	.	+
chr11	57425227	57425245	.	.	+
chr11	57435295	57435590	.	.	+
chr11	57480024	57480088	.	.	+
chr11	57508810	57509061	.	.	+
chr11	57529232	57529744	.	.	+
chr11	57570543	57570856	.	.	+
chr11	57584229	57584621	.	.	+
chr1	15764865	15764992	.	.	+
chr1	15766794	15767080	.	.	+
chr1	15768961	15769035	.	.	+
chr1	15769914	15769985	.	.	+
chr1	15783153	15783641	.	.	+
chr1	15789244	15789352	.	.	+
chr1	15789884	15789995	.	.	+
chr1	157963405	157963460	.	.	+
chr1	15802549	15802984	.	.	+
chr11	58078478	58078479	.	.	+
chr1	158120234	158120235	.	.	+
chr11	58343327	58343330	.	.	-
chr11	58345221	58345581	.	.	+
chr11	58345329	58345773	.	.	-
chr11	58346184	58346364	.	.	-
chr1	15850682	15850759	.	.	-
chr1	15853063	15853384	.	.	+
chr11	58910303	58910735	.	.	+
chr1	1590400	1590670	.	.	-
chr1	1590499	1590759	.	.	+
chr11	592078	592079	.	.	-
chr1	15929927	15930168	.	.	-
chr1	15931022	15931044	.	.	+
chr11	59578163	59578409	.	.	-
chr11	59633959	59633960	.	.	-
chr1	159684373	159684461	.	.	-
chr1	159893128	159893565	.	.	-
chr1	159893649	159894002	.	.	+
chr1	159894097	159894400	.	.	-
chr1	159894462	159894591	.	.	+
chr1	159894884	159895345	.	.	-
chr1	159894948	159895412	.	.	+
chr1	160001312	160001785	.	.	-
chr11	60145972	60146328	.	.	+
chr1	160175173	160175216	.	.	+
chr1	160231470	160232035	.	.	+
chr1	160231962	160232690	.	.	-
chr1	160254724	160254938	.	.	-
chr1	160312739	160313648	.	.	+
chr1	160312962	160313084	.	.	-
chr11	60467084	60467179	.	.	+
chr11	60609161	60609898	.	.	+
chr11	60623348	60623349	.	.	+
chr11	60623409	60623462	.	.	-
chr1	160632809	160632810	.	.	-
chr11	60673900	60674088	.	.	-
chr11	60677101	60677102	.	.	+
chr11	60681353	60681723	.	.	+
chr11	60886713	60886767	.	.	+
chr11	60928187	60929141	.	.	-
chr11	60929224	60929251	.	.	+
chr11	60970984	60970987	.	.	+
chr1	160990624	160991297	.	.	+
chr1	160990661	160991239	.	.	-
chr1	161008694	161008793	.	.	-
chr1	161015685	161015767	.	.	-
chr1	161059256	161059393	.	.	-
chr11	61081435	61081905	.	.	-
chr1	161087412	161087859	.	.	-
chr1	161087882	161087899	.	.	+
chr11	61100385	61101018	.	.	-
chr11	61100694	61100747	.	.	+
chr1	161102116	161102437	.	.	-
chr1	161123543	161124207	.	.	+
chr11	61129340	61129799	.	.	-
chr11	61129443	61129897	.	.	+
chr1	161135822	161136302	.	.	+
chr1	161147247	161147317	.	.	-
chr11	61159889	61160124	.	.	+
chr1	161168405	161168846	.	.	-
chr1	161172137	161172200	.	.	+
chr11	61197256	61197471	.	.	-
chr11	61197505	61197663	.	.	+
chr1	161283820	161284225	.	.	+
chr11	61285169	61285771	.	.	-
chr11	61300548	61301157	.	.	-
chr1	161337261	161338015	.	.	-
chr11	61348298	61348354	.	.	-
chr11	61349802	61349806	.	.	-
chr11	61447874	61447939	.	.	+
chr11	61449847	61450003	.	.	+
chr1	161475246	161475463	.	.	+
chr1	161494140	161494730	.	.	+
chr11	61560039	61560381	.	.	-
chr11	61560256	61560406	.	.	+
chr1	161575960	161575968	.	.	+
chr11	615947	615999	.	.	-
chr11	61595492	61595937	.	.	+
chr11	61599731	61599732	.	.	+
chr1	16161354	16161440	.	.	-
chr1	16162201	16162449	.	.	-
chr1	16162589	16162615	.	.	+
chr1	161657103	161657104	.	.	+
chr1	161719541	161719951	.	.	+
chr11	61734694	61735132	.	.	-
chr1	161736000	161736313	.	.	+
chr1	16174507	16174512	.	.	+
chr11	61891468	61891501	.	.	+
chr11	61976069	61976201	.	.	+
chr1	16218009	16218010	.	.	-
chr11	62192263	62192265	.	.	-
chr11	62297014	62297413	.	.	-
chr1	162319858	162319859	.	.	-
chr11	62339077	62339337	.	.	-
chr11	62341313	62341772	.	.	-
chr11	62341664	62341938	.	.	+
chr11	62342027	62342459	.	.	-
chr11	62358968	62359101	.	.	-
chr11	62368721	62368752	.	.	-
chr11	62369297	62369394	.	.	-
chr11	62389424	62389519	.	.	-
chr11	62414067	62414115	.	.	-
chr11	62432595	62432707	.	.	-
chr11	62432781	62432962	.	.	+
chr11	62439134	62439353	.	.	+
chr11	62446344	62446589	.	.	-
chr11	62473575	62473800	.	.	-
chr11	62476947	62477008	.	.	-
chr11	62495942	62496286	.	.	+
chr11	62521631	62521632	.	.	-
chr11	62528993	62529110	.	.	+
chr1	162531450	162531882	.	.	+
chr11	62538856	62538908	.	.	+
chr11	62554809	62554898	.	.	+
chr11	6255693	6255923	.	.	-
chr11	62559475	62559496	.	.	-
chr11	62572815	62572953	.	.	-
chr1	162593634	162593635	.	.	-
chr11	62599095	62599560	.	.	-
chr11	62599291	62599765	.	.	+
chr1	162602220	162602347	.	.	+
chr11	62607041	62607075	.	.	-
chr11	62609026	62609284	.	.	-
chr1	16261019	16261744	.	.	+
chr11	62622938	62623358	.	.	-
chr11	62623468	62623772	.	.	+
chr11	62648331	62648546	.	.	+
chr11	62649163	62649224	.	.	+
chr11	62649274	62649431	.	.	+
chr1	162760487	162760571	.	.	+
chr1	162792145	162792146	.	.	+
chr11	6281072	6281313	.	.	+
chr1	16302573	16302605	.	.	-
chr1	163038449	163039234	.	.	+
chr1	163172686	163172865	.	.	-
chr1	163291523	163291578	.	.	-
chr11	63381530	63382005	.	.	-
chr11	63438792	63439227	.	.	-
chr11	63448914	63449256	.	.	+
chr11	63655986	63656374	.	.	+
chr11	63706447	63706510	.	.	+
chr11	63741955	63742152	.	.	+
chr11	63753888	63753927	.	.	+
chr11	63953142	63953198	.	.	-
chr11	63953623	63953711	.	.	+
chr11	63993613	63993905	.	.	-
chr11	63993717	63994219	.	.	+
chr11	63994386	63994518	.	.	+
chr11	63998013	63998187	.	.	+
chr11	64008107	64009016	.	.	+
chr11	64008358	64008415	.	.	-
chr11	64012868	64013290	.	.	-
chr11	64013385	64013505	.	.	+
chr11	64038992	64039137	.	.	+
chr11	64052068	64052279	.	.	-
chr11	64052271	64052339	.	.	+
chr11	64084829	64085479	.	.	-
chr11	64085568	64085763	.	.	+
chr11	6411243	6412147	.	.	+
chr11	6411456	6411562	.	.	-
chr11	64122723	64122919	.	.	+
chr11	6426233	6426811	.	.	-
chr1	164325979	164325980	.	.	+
chr11	6439918	6440649	.	.	-
chr11	64497308	64497311	.	.	-
chr1	164528294	164528422	.	.	+
chr11	64537455	64537846	.	.	-
chr11	64545914	64546241	.	.	-
chr11	64645998	64646002	.	.	-
chr11	64684526	64684690	.	.	-
chr11	64703362	64703370	.	.	-
chr1	164742164	164742209	.	.	+
chr1	164761209	164761225	.	.	-
chr11	64764441	64764444	.	.	-
chr11	64781217	64781702	.	.	+
chr11	64794936	64794966	.	.	+
chr1	16481381	16481746	.	.	+
chr11	64851588	64851910	.	.	+
chr11	64863580	64863878	.	.	+
chr11	64879316	64879357	.	.	+
chr11	64880201	64880216	.	.	+
chr11	64885137	64885249	.	.	-
chr11	64889111	64889663	.	.	-
chr11	64889706	64889817	.	.	+
chr11	64901943	64902040	.	.	-
chr11	64915054	64915061	.	.	+
chr11	64948769	64948860	.	.	+
chr11	64949157	64949458	.	.	+
chr11	6495089	6495136	.	.	-
chr11	6502176	6502602	.	.	-
chr11	6502656	6502799	.	.	+
chr11	65029332	65029576	.	.	+
chr11	65061718	65061720	.	.	-
chr11	65082315	65082423	.	.	+
chr11	65101236	65101357	.	.	+
chr11	65149441	65149949	.	.	-
chr11	65153747	65154161	.	.	+
chr11	65160047	65160048	.	.	+
chr11	65184007	65184420	.	.	+
chr11	65185681	65186525	.	.	-
chr11	65186399	65186722	.	.	+
chr11	65187219	65187608	.	.	-
chr11	65187593	65187858	.	.	+
chr11	65188621	65189107	.	.	-
chr11	65188690	65189017	.	.	+
chr11	65189269	65189747	.	.	-
chr11	65190173	65190756	.	.	+
chr11	65190821	65191742	.	.	+
chr11	65192411	65193017	.	.	+
chr11	65193382	65193868	.	.	+
chr11	65194356	65195177	.	.	+
chr11	65195180	65195915	.	.	+
chr11	65196387	65196777	.	.	+
chr11	65196817	65197406	.	.	+
chr11	65197758	65198205	.	.	+
chr11	65199082	65199566	.	.	+
chr11	65199657	65200356	.	.	+
chr11	65200571	65201650	.	.	+
chr11	65202053	65202476	.	.	+
chr11	65202666	65202958	.	.	+
chr11	65203172	65204192	.	.	+
chr11	65204489	65205303	.	.	+
chr11	65205361	65206326	.	.	+
chr11	65207425	65207742	.	.	+
chr11	65208403	65208914	.	.	+
chr11	65209346	65209957	.	.	+
chr11	65210610	65210611	.	.	-
chr11	65210875	65211764	.	.	+
chr11	65211844	65212200	.	.	+
chr11	65222713	65222759	.	.	+
chr11	65239180	65239738	.	.	-
chr11	65244738	65245007	.	.	-
chr11	65245066	65245160	.	.	+
chr11	65264820	65264890	.	.	-
chr11	65265106	65265681	.	.	+
chr11	65266462	65269265	.	.	+
chr11	65269315	65269351	.	.	+
chr11	65269361	65269379	.	.	+
chr11	65269658	65269662	.	.	+
chr11	65269985	65270650	.	.	+
chr11	65270675	65273172	.	.	+
chr11	65292547	65292988	.	.	+
chr11	65337491	65337965	.	.	+
chr11	65337800	65337863	.	.	-
chr11	65381529	65381809	.	.	-
chr11	65383231	65383295	.	.	+
chr1	165414204	165414556	.	.	-
chr11	65430358	65430426	.	.	-
chr11	65430534	65430948	.	.	+
chr11	65479488	65479850	.	.	+
chr11	65487907	65488302	.	.	-
chr11	65554533	65554570	.	.	+
chr1	1655739	1655857	.	.	-
chr1	165600442	165600928	.	.	+
chr11	65625215	65625714	.	.	-
chr11	65627879	65627931	.	.	+
chr11	65655882	65656366	.	.	-
chr11	65666924	65667098	.	.	+
chr1	165667722	165667853	.	.	-
chr11	65686868	65686950	.	.	+
chr1	165737779	165738152	.	.	-
chr11	65769577	65769961	.	.	-
chr11	65769715	65770266	.	.	+
chr11	65819657	65820126	.	.	+
chr11	65951242	65951244	.	.	-
chr11	66025052	66025088	.	.	-
chr11	66035834	66036328	.	.	+
chr11	66056181	66056618	.	.	-
chr11	66056859	66056914	.	.	+
chr11	66103872	66104225	.	.	-
chr11	66112402	66112596	.	.	-
chr11	66115061	66115140	.	.	-
chr1	166131911	166131912	.	.	-
chr11	66188057	66188288	.	.	-
chr11	66188476	66188566	.	.	+
chr11	66206096	66206319	.	.	-
chr1	166246842	166246847	.	.	-
chr11	66247643	66247726	.	.	-
chr11	66247722	66247917	.	.	+
chr11	6624791	6624915	.	.	-
chr11	6624975	6625300	.	.	+
chr11	66278104	66278178	.	.	+
chr11	6635236	6635672	.	.	-
chr11	66360262	66360676	.	.	+
chr11	66384064	66384596	.	.	+
chr11	66405701	66406406	.	.	+
chr11	6640611	6640997	.	.	-
chr11	66445040	66445346	.	.	-
chr11	66445477	66445575	.	.	+
chr11	66486141	66486340	.	.	-
chr11	66567036	66567037	.	.	+
chr11	66725824	66725884	.	.	-
chr1	16678920	16678976	.	.	-
chr1	166808734	166808762	.	.	+
chr1	166845469	166845691	.	.	-
chr11	66886727	66886755	.	.	+
chr1	16693572	16693783	.	.	+
chr11	67007442	67007802	.	.	+
chr11	67022668	67023061	.	.	+
chr11	6704415	6704627	.	.	-
chr11	67120745	67121079	.	.	-
chr11	67159456	67159537	.	.	+
chr11	67168863	67169351	.	.	-
chr1	167190114	167190179	.	.	+
chr11	67195949	67195996	.	.	+
chr11	67210743	67211279	.	.	-
chr11	67250484	67250616	.	.	+
chr11	67275276	67275922	.	.	-
chr11	67351177	67351649	.	.	+
chr11	67374319	67374432	.	.	+
chr11	67417974	67418213	.	.	-
chr11	67450554	67450556	.	.	-
chr11	67563146	67563148	.	.	-
chr11	67616109	67616173	.	.	-
chr11	67626447	67626457	.	.	-
chr1	167651351	167651352	.	.	+
chr1	16767123	16767247	.	.	+
chr11	67798065	67798372	.	.	+
chr1	167905096	167905393	.	.	-
chr11	68039379	68039424	.	.	-
chr1	168101679	168102085	.	.	+
chr1	168148075	168148592	.	.	+
chr11	68180714	68181225	.	.	+
chr1	168195190	168195403	.	.	+
chr11	68228175	68228282	.	.	+
chr11	68597191	68597192	.	.	-
chr11	68609299	68609310	.	.	-
chr11	68630295	68630296	.	.	+
chr11	68671277	68671311	.	.	-
chr11	68671350	68671420	.	.	+
chr1	168698439	168698445	.	.	-
chr1	168773488	168773489	.	.	+
chr11	68791056	68791057	.	.	+
chr1	169075557	169076054	.	.	+
chr1	169077078	169077186	.	.	+
chr1	169336560	169337050	.	.	-
chr1	169337179	169337517	.	.	+
chr1	169396601	169396712	.	.	-
chr11	69418733	69418734	.	.	-
chr1	169455180	169455182	.	.	-
chr1	169455314	169455433	.	.	+
chr11	69455873	69456227	.	.	+
chr11	69490069	69490143	.	.	-
chr11	69515359	69515360	.	.	-
chr1	169555665	169555719	.	.	-
chr11	695798	695816	.	.	+
chr1	169703077	169703223	.	.	-
chr1	16971153	16971209	.	.	-
chr1	169863033	169863108	.	.	-
chr1	170043657	170044137	.	.	-
chr1	17007446	17007897	.	.	+
chr11	70116310	70116613	.	.	-
chr11	70244209	70244692	.	.	+
chr1	170501233	170501342	.	.	+
chr11	706230	706235	.	.	+
chr1	170632273	170632625	.	.	+
chr11	71159387	71159468	.	.	-
chr11	71159622	71159859	.	.	+
chr11	71164229	71164298	.	.	+
chr1	171454461	171454834	.	.	+
chr1	171455128	171455173	.	.	-
chr11	71456595	71456982	.	.	+
chr11	71495598	71495610	.	.	+
chr1	171514649	171514765	.	.	+
chr1	171526447	171526737	.	.	+
chr11	715918	715919	.	.	-
chr11	71640072	71640142	.	.	+
chr11	71710533	71710688	.	.	+
chr1	171711100	171711575	.	.	-
chr1	171711293	171711590	.	.	+
chr11	71751779	71752590	.	.	-
chr11	71752909	71753154	.	.	-
chr11	71780936	71781132	.	.	-
chr11	71791213	71791991	.	.	-
chr11	71791715	71791899	.	.	+
chr1	171810637	171810833	.	.	+
chr11	71814246	71814397	.	.	-
chr11	71823280	71823846	.	.	-
chr1	17199772	17200631	.	.	-
chr1	172076161	172076164	.	.	-
chr11	72145249	72145763	.	.	-
chr1	17215944	17216167	.	.	-
chr1	17222341	17222478	.	.	+
chr1	17231691	17231700	.	.	+
chr1	172413102	172413244	.	.	-
chr11	72433088	72433396	.	.	-
chr11	72492291	72492748	.	.	-
chr1	172501553	172501950	.	.	-
chr1	172502257	172502772	.	.	+
chr11	72504602	72505035	.	.	-
chr11	72525110	72525111	.	.	-
chr1	172576971	172577060	.	.	+
chr11	72853110	72853185	.	.	-
chr1	172862224	172862233	.	.	-
chr1	17307108	17307134	.	.	-
chr11	73309027	73309234	.	.	-
chr11	73358653	73358728	.	.	+
chr1	173446422	173446836	.	.	+
chr11	73471849	73472158	.	.	-
chr11	73498913	73499300	.	.	+
chr11	73587388	73588018	.	.	-
chr11	73587743	73588055	.	.	+
chr11	73683991	73683992	.	.	-
chr1	173684062	173684155	.	.	+
chr11	73693884	73693889	.	.	-
chr1	173760686	173760687	.	.	+
chr1	173793713	173794135	.	.	+
chr1	17380461	17380756	.	.	-
chr1	173835933	173836183	.	.	-
chr1	173836949	173837585	.	.	-
chr1	173837371	173837518	.	.	+
chr11	73881845	73882263	.	.	-
chr11	73882131	73882471	.	.	+
chr1	173991494	173991523	.	.	-
chr1	173991620	173991685	.	.	+
chr11	74109369	74109531	.	.	-
chr1	174128582	174128722	.	.	+
chr11	74268390	74268391	.	.	+
chr11	74303590	74303758	.	.	+
chr1	174397526	174397527	.	.	+
chr11	74457237	74457242	.	.	-
chr11	74659865	74660361	.	.	-
chr11	74660232	74660445	.	.	+
chr11	74699706	74700008	.	.	+
chr11	747413	747507	.	.	+
chr1	174768600	174769248	.	.	+
chr1	174844652	174844770	.	.	+
chr1	174846414	174846445	.	.	+
chr11	74865133	74865134	.	.	-
chr1	174923870	174923872	.	.	-
chr1	174969118	174969457	.	.	+
chr1	174992531	174992571	.	.	-
chr11	75062666	75062707	.	.	-
chr11	75110292	75110594	.	.	+
chr11	75113399	75113484	.	.	+
chr11	75115100	75115465	.	.	+
chr1	175161846	175162224	.	.	-
chr11	75273170	75273352	.	.	+
chr11	7534855	7534896	.	.	-
chr11	75370395	75370754	.	.	+
chr11	75476666	75477157	.	.	-
chr11	76149016	76149019	.	.	-
chr11	76155961	76156168	.	.	+
chr1	176176778	176176870	.	.	+
chr11	76381686	76381793	.	.	-
chr11	76494399	76494401	.	.	+
chr1	176522160	176522848	.	.	+
chr11	77184616	77185148	.	.	-
chr11	77348807	77348863	.	.	-
chr1	17743184	17743186	.	.	+
chr11	77531604	77532061	.	.	-
chr11	77705698	77705915	.	.	-
chr11	77734188	77734358	.	.	-
chr11	777475	777506	.	.	-
chr11	77790704	77791376	.	.	-
chr11	77850645	77850678	.	.	-
chr11	77854440	77854441	.	.	-
chr11	77899862	77900204	.	.	+
chr1	177953418	177953468	.	.	-
chr1	178006906	178007120	.	.	-
chr1	178063237	178063628	.	.	+
chr11	78285828	78285916	.	.	-
chr1	178340508	178340582	.	.	+
chr1	178694328	178694439	.	.	+
chr11	78781042	78781043	.	.	+
chr1	17906677	17907050	.	.	+
chr1	179112207	179112211	.	.	-
chr1	179262867	179263326	.	.	+
chr11	796202	796238	.	.	-
chr11	797923	798258	.	.	-
chr1	179807989	179808323	.	.	+
chr1	179818115	179818128	.	.	+
chr1	179846891	179846986	.	.	-
chr1	179851240	179852111	.	.	+
chr1	179851767	179852170	.	.	-
chr1	179853107	179853206	.	.	+
chr1	179864544	179864889	.	.	+
chr1	179869396	179869398	.	.	+
chr1	179874363	179874379	.	.	+
chr1	179923891	179923945	.	.	+
chr11	8008883	8008888	.	.	+
chr1	180471454	180472009	.	.	-
chr11	80489722	80489723	.	.	+
chr1	180601121	180601326	.	.	+
chr11	809214	809872	.	.	-
chr11	809623	810273	.	.	+
chr1	180991677	180992028	.	.	-
chr1	181003069	181003167	.	.	+
chr1	181057833	181057932	.	.	+
[truncated: 13,175 more rows]
